# Supplementary material
Source: publisher figshare collection journal article supplement (https://geolsoc.figshare.com/ndownloader/files/35991943)
Supplement: Supplementary file 1 [file 35991943]

## Sheet: White-mica
Table S2. White-mica composition data of the Type-1, Type-2, and Type-3 deposits of AFMP
Mineral System	Deposits	Sample nº	Eletron Microprobe analyses data (Oxides)										Number of ions on the basis of 11 O equivalents													Fe# A	R2+ B	R3+ C	Si/AlIV	Tmin	Tmax	Pmin	Pmax	Authors
			SiO2	TiO	Al2O3	FeO	MnO	MgO	CaO	Na2O	K2O	Total	Si	Al	AlIV	AlVI	Fe2+	Fe3+	FeTot	Mg	Ti	Mn	Ca	Na	K					(°C)	(°C)	(kbar)	(kbar)
Type-1 deposits	Paraíba	Ms-17	47.19	0.06	30.46	3.61	0.09	1.81	0	0.16	10.57	93.95	3.20306	2.43655	0.796942	1.63961	0.206236	0	0.206236	0.183109	0.00306231	0.00517364	0	0.0210544	0.915164	0.529699	0.394519	2.64584	4.01919	385	408	4.2	4.49	Poggi 2019
		Ms-18	46.55	0.24	30.88	4	0.07	1.71	0	0.21	10.47	94.13	3.15977	2.47027	0.840227	1.63004	0.228689	0	0.228689	0.173001	0.0122498	0.00402414	0	0.0276353	0.90655	0.569317	0.405715	2.7112	3.76062	385	408	3.03	3.32
		Ms-19	47.34	0.05	30.74	3.61	0.06	1.81	0	0.2	10.42	94.23	3.19947	2.44841	0.800534	1.64787	0.205346	0	0.205346	0.182324	0.00254099	0.00343431	0	0.0262052	0.89831	0.529692	0.391105	2.65629	3.99667	385	408	4.1	4.39
		Ms-28	46.37	0.42	30.36	3.86	0.05	2.25	0	0.21	10.41	93.97	3.15567	2.43493	0.844327	1.5906	0.221202	0	0.221202	0.22822	0.0214925	0.0028818	0	0.0277066	0.90368	0.492192	0.452304	2.67763	3.7375	321	348	2.12	2.46
		Ms-29	46.09	0.45	29.8	3.9	0.07	2.23	0	0.22	10.34	93.13	3.16615	2.41252	0.833853	1.57867	0.22563	0	0.22563	0.228321	0.0232445	0.0040725	0	0.0292992	0.906054	0.497035	0.458024	2.66139	3.79701	321	348	2.4	2.74
		Ms-30	46.95	0.23	28.82	3.54	0.09	2.61	0	0.1	10.35	92.72	3.2308	2.33721	0.769203	1.56801	0.205023	0	0.205023	0.26769	0.011901	0.00524512	0	0.0133408	0.908497	0.433716	0.477958	2.55414	4.20019	321	348	4.14	4.48
		Ms-31	48.26	0.04	29.68	2.6	0.04	2.71	0	0.15	10.16	93.64	3.26322	2.36512	0.73678	1.62834	0.147696	0	0.147696	0.273115	0.00203377	0.00229064	0	0.0196634	0.876318	0.35098	0.423102	2.51485	4.42903	321	348	5	5.34
		Ms-32	47.97	0.03	28.61	3.22	0.08	2.92	0	0.1	10.26	93.19	3.27227	2.3	0.727733	1.57226	0.184749	0	0.184749	0.296879	0.0015388	0.00462176	0	0.0132247	0.892761	0.383593	0.486249	2.48628	4.49652	321	348	5.24	5.58
		Ms-33	47.93	0.21	27.86	2.21	0.04	4.68	0	0.14	10.51	93.59	3.25918	2.23261	0.74082	1.49179	0.126164	0	0.126164	0.474312	0.0107375	0.00230356	0	0.018456	0.911617	0.210106	0.602779	2.36951	4.39942	321	348	4.89	5.23
		Ms-34	48.19	0.15	28.38	2.56	0.05	3.52	0	0.09	10.3	93.26	3.28008	2.27651	0.71992	1.55659	0.146382	0	0.146382	0.357098	0.00767718	0.00288228	0	0.0118762	0.89428	0.29074	0.506362	2.43057	4.55617	321	348	5.45	5.78
		Ms-35	48	0.26	27.75	3.13	0.08	3.37	0	0.08	10.29	93.02	3.28543	2.23843	0.714573	1.52386	0.180168	0	0.180168	0.343793	0.0133816	0.00463745	0	0.0106157	0.898411	0.343858	0.528599	2.43198	4.59775	321	348	5.59	5.92
		Ms-36	48.72	0.22	28.03	2.05	0.04	3.62	0	0.11	10.46	93.31	3.31138	2.2452	0.688619	1.55658	0.116942	0	0.116942	0.366714	0.0112437	0.00230251	0	0.0144945	0.906865	0.241788	0.485959	2.37339	4.80873	321	348	6.27	6.61
		MA20J_1_1	47.55	0.33	30.11	2.92	0.09	2.54	0.07	0.1	10.91	94.67	3.22359	2.40563	0.776413	1.62922	0.165529	0	0.165529	0.256649	0.0168223	0.00516738	0.00508404	0.0131431	0.943458	0.392084	0.427346	2.58799	4.15189	318	358	3.91	4.41	Silva and Abram 2008
		MA20J_1_2	48.15	0.41	27.88	2.85	0.14	4.09	0.01	0.07	11.07	94.74	3.27069	2.23186	0.729305	1.50255	0.161879	0	0.161879	0.41408	0.0209416	0.00805398	0.000727722	0.00921828	0.959181	0.281061	0.584013	2.41468	4.48467	318	358	5.16	5.66
		MA20E_3_3	48.66	0.22	26.76	2.99	0.1	6.33	0	0	11.27	96.49	3.26053	2.11316	0.739465	1.3737	0.167529	0	0.167529	0.632175	0.0110847	0.00567486	0	0	0.963274	0.209489	0.80538	2.29178	4.40932	318	358	4.89	5.39
	Peteca	mu1-1	46.71	0.23	31.1	3.63	0.01	1.58	0.01	0.1	11.04	94.41	3.18031	2.49546	0.819688	1.67577	0.207011	0	0.207011	0.160337	0.0117753	0.000576632	0.000729427	0.0131998	0.958822	0.563528	0.367925	2.71424	3.87991	254	389	1.94	3.64	Pimenta 2018 and new data
		mu1-2	46.8	0.06	30.72	3.89	0.04	1.83	0.05	0.18	10.31	93.9	3.18651	2.46502	0.813493	1.65153	0.222496	0	0.222496	0.185711	0.00307187	0.00230658	0.00364721	0.0237602	0.895441	0.545058	0.410514	2.69059	3.91707	254	389	2.11	3.8
		mu1-3	48.13	0.09	31.18	2.92	0.07	1.69	0	0.15	10.99	95.23	3.23438	2.46934	0.765623	1.70372	0.164082	0	0.164082	0.169269	0.00454779	0.00398393	0	0.0195422	0.942066	0.492219	0.337335	2.63797	4.2245	254	389	3.39	5.09
		mu2-1	46.65	0.12	31.11	3.23	0.06	1.61	0.01	0.18	11.04	94.01	3.18815	2.50563	0.811848	1.69378	0.184701	0	0.184701	0.163995	0.00616668	0.00347278	0.000732166	0.0238489	0.962422	0.529691	0.352169	2.6965	3.92703	254	389	2.16	3.85
		mu2-2	47.54	0.07	30.56	3.52	0	1.65	0.02	0.18	10.89	94.43	3.23181	2.44833	0.768192	1.68014	0.200166	0	0.200166	0.167181	0.00357822	0	0.00145659	0.0237229	0.944329	0.544895	0.367347	2.65207	4.20703	254	389	3.33	5.02
		mu2-3	46.87	0.07	29.76	3.82	0.03	1.74	0.01	0.08	10.8	93.18	3.23211	2.41855	0.76789	1.65066	0.220647	0	0.220647	0.178837	0.00362971	0.00175207	0.000738777	0.0106952	0.950001	0.55233	0.401237	2.64282	4.20908	254	389	3.33	5.02
		mu2-4	46.56	0.07	30.95	3.67	0.02	1.58	0.13	0.15	10.87	94	3.18432	2.49456	0.815679	1.67889	0.210198	0	0.210198	0.161056	0.00359986	0.00115844	0.00952509	0.0198886	0.948293	0.566183	0.372413	2.70836	3.90389	254	389	2.05	3.74
		mu3-1	46.52	0.21	31.72	3.91	0.05	1.36	0.01	0.18	10.86	94.82	3.15258	2.53332	0.847423	1.68589	0.222168	0	0.222168	0.137367	0.0107011	0.00286969	0.000726019	0.0236487	0.938782	0.617931	0.362404	2.76618	3.72019	254	389	1.2	2.89
		mu3-2	47.41	0.1	31.1	3.34	0.02	1.4	0	0.16	10.86	94.39	3.22068	2.48982	0.77932	1.7105	0.189726	0	0.189726	0.14175	0.00510812	0.00115066	0	0.021072	0.941058	0.572368	0.332627	2.68466	4.13268	254	389	3.03	4.72
		mu3-3	47.2	0.05	30.79	3.13	0.03	1.23	0.04	0.51	10.71	93.69	3.2299	2.48306	0.770103	1.71295	0.179099	0	0.179099	0.125449	0.00257276	0.00173863	0.00293244	0.0676589	0.934857	0.588081	0.306288	2.66473	4.19411	254	389	3.27	4.97
		mu4-1	48.21	0.2	29.76	3.58	0.06	1.82	0.04	0.07	10.7	94.44	3.27114	2.37972	0.728857	1.65086	0.203239	0	0.203239	0.184056	0.0102041	0.00344788	0.00290766	0.00920807	0.926094	0.524765	0.390743	2.59316	4.48805	254	389	4.37	6.06
		mu4-2	46.68	0.15	30.77	4.33	0.03	1.79	0.05	0.15	10.45	94.4	3.16895	2.46174	0.831045	1.6307	0.247135	0	0.247135	0.181115	0.00765702	0.00172483	0.00363645	0.0197417	0.904921	0.57708	0.429975	2.71654	3.81322	254	389	1.64	3.33
		mu4-3	49.16	0.25	29.01	3.27	0	1.58	0.03	0.11	10.66	94.07	3.33791	2.32135	0.662085	1.65927	0.185658	0	0.185658	0.159896	0.012764	0	0.00218226	0.0144799	0.923272	0.537277	0.345554	2.51978	5.04152	254	389	6.12	7.82
		mu5-1	47.3	0.31	30.5	3.32	0.04	1.67	0	0.13	11.08	94.35	3.22218	2.44861	0.777819	1.67079	0.189117	0	0.189117	0.16956	0.0158794	0.00230774	0	0.0171688	0.962803	0.527263	0.360984	2.6536	4.14259	254	389	3.07	4.76
		mu5-2	46.78	0.5	29.6	3.4	0.04	1.84	0.04	0.13	10.94	93.3	3.22817	2.40723	0.771831	1.6354	0.196191	0	0.196191	0.189248	0.0259447	0.00233773	0.00295718	0.0173919	0.962991	0.509006	0.387776	2.62937	4.18248	254	389	3.23	4.92
		mu5-3	51.65	0.37	27.7	3.37	0.05	1.5	0.01	0.11	10.27	95.03	3.45198	2.18177	0.548018	1.63375	0.188335	0	0.188335	0.149419	0.0185944	0.00283013	0.000716012	0.0142528	0.875543	0.55761	0.340584	2.3887	6.29903	254	389	9.07	10.76
		mu5-4	47.4	0.23	29.64	3.89	0.02	1.66	0	0.14	10.73	93.71	3.25087	2.39568	0.749132	1.64655	0.223258	0	0.223258	0.169686	0.0118613	0.00116169	0	0.0186148	0.938706	0.568167	0.394105	2.6308	4.33951	254	389	3.83	5.52
		mu6	50.59	0.17	28.4	2.62	0.01	1.34	0.07	0.76	8.4	92.36	3.43501	2.27254	0.564992	1.70755	0.148754	0	0.148754	0.135608	0.00867951	0.000575045	0.00509194	0.100043	0.727531	0.523114	0.284937	2.42997	6.07975	254	389	8.63	10.32
		mu7-1	50.77	0.09	27.63	3.83	0	1.78	0.06	0.14	10.34	94.64	3.42265	2.19516	0.577346	1.61782	0.215903	0	0.215903	0.178852	0.00456228	0	0.0043334	0.0182975	0.889171	0.546929	0.394754	2.41563	5.92826	254	389	8.32	10.01
		mu7-2	47.33	0.07	30.03	3.61	0.03	1.7	0.07	0.16	11.05	94.06	3.23964	2.4224	0.760365	1.66203	0.206619	0	0.206619	0.173431	0.00360281	0.00173908	0.0051331	0.0212319	0.964786	0.543663	0.381789	2.63262	4.26063	254	389	3.53	5.23
		mu7-3	46.65	0.08	30.05	5.02	0.03	1.88	0.02	0.15	11.09	94.97	3.17442	2.40984	0.825577	1.58426	0.287142	0	0.287142	0.190673	0.00409342	0.00172891	0.00145803	0.0197885	0.962617	0.600949	0.479543	2.70107	3.8451	254	389	1.79	3.48
		mu8-1	46.56	0.09	30.1	4.49	0.02	1.89	0.01	0.14	11.16	94.46	3.18242	2.4246	0.817582	1.60702	0.25761	0	0.25761	0.192541	0.00462562	0.00115775	0.000732261	0.0185516	0.97301	0.572274	0.451308	2.68684	3.89247	254	389	2	3.69
		mu8-2	46.46	0.06	30.22	4.67	0.08	1.74	0.06	0.2	10.93	94.42	3.17627	2.43479	0.823734	1.61106	0.268088	0	0.268088	0.177298	0.00308441	0.00463198	0.00439451	0.0265079	0.953162	0.601922	0.450018	2.70597	3.85594	254	389	1.84	3.53
		mu9-1	49.66	0.01	32.23	1.5	0.02	1.21	0.04	0.16	10.88	95.71	3.28042	2.50907	0.719582	1.78949	0.0828546	0	0.0828546	0.119131	0.000496713	0.0011189	0.00283077	0.0204904	0.91677	0.410201	0.203105	2.59242	4.55878	254	389	4.61	6.31
		mu9-2	48.14	0.06	30.79	2.14	0	1.43	0.07	0.26	9.73	92.63	3.28391	2.47528	0.716089	1.7592	0.122068	0	0.122068	0.145391	0.00307765	0	0.0051157	0.0343848	0.846656	0.456399	0.267459	2.60043	4.5859	254	389	4.71	6.4
		mu10	49.79	0.1	29.63	3.28	0.04	1.59	0.07	0.2	10.25	94.95	3.33832	2.34125	0.661679	1.67957	0.183892	0	0.183892	0.158891	0.00504161	0.00227135	0.00502812	0.0259971	0.876635	0.536467	0.345055	2.53018	5.04523	254	389	6.13	7.83
		mu1	48.2	0.13	29.76	2.83	0.07	1.96	0	0.12	11.01	94.08	3.27913	2.38602	0.720869	1.66515	0.160991	0	0.160991	0.19874	0.00665025	0.00403319	0	0.0158271	0.95545	0.447532	0.363764	2.55366	4.54886	254	389	4.58	6.27
		mu2	47.58	0.21	30.43	2.55	0.02	2.23	0	0.17	10.83	94.02	3.23259	2.43646	0.767405	1.66905	0.144951	0	0.144951	0.225813	0.0107283	0.00115079	0	0.0223915	0.938565	0.390952	0.371915	2.59214	4.21237	254	389	3.35	5.04
		mu3	45.86	0.11	29.62	5.3	0.15	1.92	0	0.11	11.02	94.09	3.15453	2.40113	0.845469	1.55566	0.306984	0	0.306984	0.196843	0.00568953	0.00873838	0	0.014669	0.966922	0.609305	0.512565	2.71381	3.7311	254	389	1.25	2.94
		mu4	47.2	0.1	30.59	3.01	0.02	1.74	0	0.12	10.9	93.68	3.22837	2.46576	0.771633	1.69413	0.172155	0	0.172155	0.177381	0.00514309	0.00115854	0	0.0159122	0.950991	0.492524	0.350694	2.64306	4.18381	254	389	3.23	4.92
		mu5	48.83	0.05	28.35	2.87	0.07	2.55	0	0.13	10.81	93.66	3.33349	2.28085	0.666507	1.61434	0.163832	0	0.163832	0.25946	0.00256665	0.00404715	0	0.0172054	0.941342	0.387042	0.427339	2.44724	5.00143	254	389	6.01	7.7
		mu6	46.68	0.04	29.78	2.67	0.09	2.18	0.01	0.13	10.99	92.57	3.23314	2.4308	0.766857	1.66394	0.154684	0	0.154684	0.225044	0.00208323	0.00527929	0.000742021	0.017456	0.970959	0.407354	0.385007	2.58756	4.2161	254	389	3.36	5.05
		mu7	45.05	0.05	31.73	3.63	0.09	1.27	0.01	0.1	10.86	92.79	3.12045	2.59013	0.879555	1.71058	0.210916	0	0.210916	0.131112	0.0026042	0.00527962	0.000742068	0.0134286	0.959535	0.616663	0.347308	2.80365	3.54776	254	389	0.32	2.01
Type- 2 Porphyry deposits	Paraíba	Ms-13	46.07	0.61	28.71	4.99	0.15	2.33	0	0.18	10.5	93.58	3.16905	2.32741	0.830953	1.49646	0.289665	0	0.289665	0.238882	0.0315518	0.00873857	0	0.0240044	0.921317	0.54804	0.537285	2.64863	3.81375	247	389	1.55	3.33	Poggi 2019
		Ms-14	46.22	0.54	29.37	4.53	0.12	2.09	0	0.17	10.41	93.49	3.17159	2.3751	0.82841	1.54669	0.262091	0	0.262091	0.213752	0.0278627	0.00697376	0	0.0226154	0.911185	0.550793	0.482817	2.66505	3.82852	247	389	1.62	3.4
		Ms-15	45.94	0.44	29.98	4.08	0.12	1.78	0	0.14	10.53	93.03	3.16332	2.43284	0.836681	1.59616	0.236685	0	0.236685	0.182679	0.0227818	0.00699797	0	0.0186891	0.924888	0.56439	0.426362	2.69231	3.78079	247	389	1.4	3.18
		Ms-16	46.74	0.59	28.88	4.74	0.12	2.26	0	0.2	10.42	94.07	3.19184	2.32424	0.808156	1.51608	0.273016	0	0.273016	0.230027	0.0302962	0.00694021	0	0.0264784	0.907673	0.542729	0.509983	2.62755	3.94954	247	389	2.17	3.95
		Ms-20	46.68	0.56	29.33	4.45	0.11	2	0	0.18	10.34	93.7	3.19098	2.36285	0.809018	1.55383	0.256438	0	0.256438	0.20377	0.0287849	0.00636832	0	0.0238547	0.901619	0.557222	0.466577	2.64807	3.94426	247	389	2.14	3.92
		Ms-21	47	0.45	29.92	4.22	0.1	1.95	0	0.19	10.46	94.29	3.18787	2.39163	0.812129	1.5795	0.241177	0	0.241177	0.197131	0.0229508	0.00574436	0	0.0249842	0.90499	0.550246	0.444052	2.65576	3.92533	247	389	2.06	3.84
		Ms-22	46.77	0.5	29.71	4.28	0.1	1.92	0	0.17	10.7	94.2	3.18404	2.38366	0.815962	1.56769	0.245547	0	0.245547	0.194818	0.0255955	0.00576567	0	0.0224372	0.929188	0.557599	0.446131	2.6548	3.90219	247	389	1.96	3.74
		Ms-23	46.52	0.49	29.9	4.03	0.09	1.92	0	0.2	10.46	93.64	3.1787	2.40775	0.8213	1.58645	0.231958	0	0.231958	0.195537	0.0251761	0.00520824	0	0.026494	0.911697	0.542598	0.432703	2.66488	3.87033	247	389	1.81	3.59
		Ms-24	46.12	0.37	29.9	3.99	0.07	1.87	0	0.16	10.62	93.14	3.17213	2.42361	0.827868	1.59575	0.231163	0	0.231163	0.191699	0.0191358	0.00407755	0	0.0213349	0.931742	0.546662	0.42694	2.67391	3.83169	247	389	1.64	3.42
		Ms-25	46.37	0.4	29.94	4.2	0.07	1.79	0	0.15	10.47	93.4	3.17685	2.41736	0.823152	1.59421	0.242464	0	0.242464	0.18278	0.0206064	0.00406159	0	0.0199232	0.914987	0.570175	0.429306	2.68043	3.85937	247	389	1.76	3.54
		Ms-26	46.98	0.48	29.16	4.39	0.09	2.09	0	0.15	10.52	93.88	3.20523	2.34457	0.794773	1.5498	0.252456	0	0.252456	0.212525	0.0246247	0.00520028	0	0.0198402	0.915526	0.542939	0.470181	2.62165	4.03289	247	389	2.53	4.31
		Ms-27	46.5	0.38	29.42	4.86	0.03	1.98	0	0.22	10.45	93.84	3.17863	2.37006	0.821372	1.54869	0.280271	0	0.280271	0.201729	0.0195323	0.00173679	0	0.0291553	0.911196	0.581475	0.483738	2.66986	3.8699	247	389	1.81	3.59
		Ms-37	45.85	0.52	29.45	4.75	0.04	2.33	0	0.2	10.36	93.5	3.14803	2.38295	0.851969	1.53098	0.275092	0	0.275092	0.238436	0.0268464	0.00232594	0	0.0266218	0.907337	0.53569	0.515855	2.68489	3.69501	-	-	-	-
		Ms-38	45.54	0.37	29.55	5.06	0.05	2.43	0	0.2	10.32	93.52	3.1304	2.39384	0.869601	1.52423	0.293559	0	0.293559	0.24896	0.0191246	0.00291082	0	0.0266529	0.904889	0.541103	0.54543	2.70652	3.59981	-	-	-	-
		Ms-39	44.36	0.77	29.35	4.84	0.03	2.29	0	0.22	9.81	91.67	3.1054	2.42139	0.894596	1.52679	0.285894	0	0.285894	0.238935	0.0405322	0.00177863	0	0.0298578	0.876001	0.544738	0.526607	2.74782	3.47129	-	-	-	-
		Ms-40	46.17	0.93	29.79	4.78	0.05	2.16	0	0.24	10.26	94.38	3.13824	2.38631	0.861762	1.52455	0.274047	0	0.274047	0.218825	0.0475327	0.00287829	0	0.0316261	0.889575	0.55602	0.49575	2.70789	3.64165	-	-	-	-
		Ms-45	44.67	0.91	29.71	4.68	0.04	2.11	0	0.24	10.1	92.46	3.1028	2.43204	0.8972	1.53484	0.274193	0	0.274193	0.218443	0.0475294	0.00235308	0	0.032319	0.894887	0.556584	0.494989	2.75376	3.45831	-	-	-	-
		Ms-46	46.58	1.35	30.13	4.4	0.04	1.87	0	0.23	10.18	94.78	3.1443	2.39692	0.8557	1.54122	0.250336	0	0.250336	0.188141	0.0685238	0.00228677	0	0.0300996	0.876559	0.570922	0.440764	2.71578	3.67453	247	389	0.88	2.66
		Ms-47	45.58	0.1	29.68	4.42	0.03	2.43	0	0.2	10.22	92.66	3.15086	2.41795	0.849145	1.56881	0.257586	0	0.257586	0.250367	0.00519801	0.00175636	0	0.0268036	0.901185	0.507105	0.509709	2.68074	3.71062	247	389	1.06	2.84
		Ms-48	46.13	0.09	30.6	4.23	0.03	1.89	0	0.23	10.32	93.52	3.1535	2.46525	0.846497	1.61876	0.243672	0	0.243672	0.19257	0.00462632	0.00173688	0	0.0304822	0.899909	0.55857	0.437979	2.71355	3.72536	247	389	1.13	2.91
		Ms-49	44.14	0.76	29.24	4.89	0.07	2.38	0	0.18	10.27	91.96	3.09336	2.41493	0.906642	1.50829	0.289191	0	0.289191	0.248595	0.0400493	0.00415465	0	0.0244556	0.918073	0.537744	0.54194	2.74417	3.41188	-	-	-	-
		Ms-50	45.78	0.35	29.54	4.85	0.03	2.51	0	0.23	10.14	93.43	3.14274	2.38986	0.857263	1.5326	0.280891	0	0.280891	0.256817	0.0180669	0.00174418	0	0.0306104	0.887931	0.522386	0.539452	2.68882	3.66601	247	389	0.84	2.62
		Ms-1	47.45	0.25	30.95	2.46	0.02	2.43	0	0.25	10.37	94.18	3.19706	2.45757	0.802938	1.65463	0.13921	0	0.13921	0.244027	0.012666	0.00114126	0	0.032656	0.891256	0.363248	0.384379	2.60944	3.98171	272	368	2.62	3.82
		Ms-2	47.8	0.38	28.25	3.41	0.07	3.88	0	0.25	10.58	94.63	3.2299	2.24962	0.770101	1.47952	0.193859	0	0.193859	0.39076	0.0193076	0.00400588	0	0.0327499	0.911918	0.3316	0.588625	2.46279	4.19413	272	368	3.5	4.7
		Ms-3	45.35	0.32	26.71	3.85	0.13	4.36	0	0.17	9.91	90.84	3.2011	2.22191	0.798895	1.42301	0.228895	0	0.228895	0.458697	0.0169846	0.0077715	0	0.0232638	0.892288	0.332893	0.695363	2.46779	4.00691	272	368	2.73	3.93
		Ms-4	46.66	0.4	28.68	3.62	0.11	4.01	0	0.21	10.39	94.13	3.17599	2.30061	0.824011	1.4766	0.207396	0	0.207396	0.406814	0.0204728	0.00634112	0	0.0277116	0.902109	0.337663	0.620551	2.52848	3.8543	272	368	2.05	3.26
		Ms-5	47.14	0.49	29.12	3.55	0.07	2.51	0	0.16	10.44	93.73	3.21846	2.34304	0.781541	1.5615	0.203985	0	0.203985	0.255417	0.0251558	0.00404758	0	0.0211781	0.909218	0.444023	0.463449	2.57218	4.11809	272	368	3.19	4.4
		Ms-6	47.51	0.49	30.37	2.72	0.04	2.61	0	0.18	10.55	94.56	3.19951	2.41031	0.800487	1.60983	0.153919	0	0.153919	0.261973	0.0248129	0.00228138	0	0.0235006	0.906276	0.370093	0.418173	2.58905	3.99696	272	368	2.69	3.89
		Ms-7	48.09	0.38	31.13	2.76	0.07	2.38	0	0.26	10.65	95.81	3.19539	2.43769	0.804606	1.63309	0.154101	0	0.154101	0.235702	0.0189861	0.00393919	0	0.0334928	0.902669	0.39533	0.393742	2.61078	3.97138	272	368	2.58	3.78
		Ms-9	47.21	0.52	29.51	2.65	0.06	3.42	0	0.22	10.61	94.23	3.196	2.35435	0.804002	1.55035	0.150729	0	0.150729	0.345077	0.0264703	0.00344003	0	0.0288738	0.916214	0.304009	0.499246	2.53155	3.97511	272	368	2.59	3.8
		Ms-10	46.92	0.4	27.8	3.17	0.07	4.4	0	0.23	10.5	93.49	3.2117	2.2426	0.788297	1.45431	0.182496	0	0.182496	0.448897	0.0205883	0.00405802	0	0.030522	0.916802	0.289036	0.635451	2.44569	4.07423	272	368	3.01	4.22
		Ms-11	47.56	0.28	30.93	2.53	0.04	2.42	0	0.25	10.49	94.5	3.19689	2.45017	0.803111	1.64706	0.142849	0	0.142849	0.242448	0.0141523	0.00227711	0	0.0325787	0.899436	0.370751	0.387574	2.60717	3.98063	272	368	2.62	3.82
		Ms-12	48.58	0	30.24	3.02	0.08	2.47	0	0.21	10.69	95.29	3.24268	2.3788	0.757323	1.62148	0.169469	0	0.169469	0.245731	0	0.00452246	0	0.0271753	0.910192	0.408162	0.419722	2.54827	4.28176	272	368	3.84	5.04
		Ms-41	45.22	0.48	29.48	5.07	0.06	2.54	0	0.2	10.25	93.3	3.11735	2.39504	0.882651	1.51239	0.294999	0	0.294999	0.260979	0.0248817	0.00350304	0	0.0267296	0.901338	0.530594	0.559481	2.71492	3.5318	-	-	-	-
		Ms-42	45.9	0.45	29.68	3.89	0.05	2.59	0	0.22	10.49	93.27	3.15286	2.40263	0.847139	1.55549	0.22503	0	0.22503	0.265161	0.0232428	0.00290871	0	0.029297	0.919129	0.459067	0.4931	2.6509	3.72178	-	-	-	-
		Ms-43	45.96	0.43	29	4.44	0.03	2.62	0	0.19	10.19	92.86	3.17053	2.35765	0.829474	1.52818	0.258219	0	0.258219	0.269383	0.022305	0.00175271	0	0.0254105	0.896674	0.48942	0.529354	2.63817	3.82233	-	-	-	-
		Ms-44	45.36	0.45	29.42	5.18	0.05	2.78	0	0.25	10.34	93.83	3.11319	2.3796	0.886815	1.49279	0.300116	0	0.300116	0.284377	0.0232235	0.0029063	0	0.0332644	0.905235	0.513464	0.587399	2.70294	3.51053	-	-	-	-
	Peteca	mu1-1	45.37	0.04	34.27	2.26	0.04	0.55	0	0.35	11.14	94.05	3.0889	2.74966	0.911097	1.83857	0.128661	0	0.128661	0.0558104	0.00204776	0.0023064	0	0.0461968	0.967453	0.697458	0.186778	2.88037	3.39031	-	-	-	-	Pimenta 2018 and new data
		mu1-2	45.56	0	33.74	2.59	0.06	0.83	0	0.38	11.14	94.34	3.09949	2.70509	0.900506	1.80459	0.147336	0	0.147336	0.0841593	0	0.00345698	0	0.0501186	0.966721	0.636454	0.234953	2.85243	3.44195	292	384	0.22656	1.37932
		mu2-1	44.81	0	33.92	2.2	0	0.73	0	0.48	10.9	93.08	3.08209	2.74952	0.917906	1.83161	0.126531	0	0.126531	0.0748361	0	0	0	0.064006	0.956327	0.62836	0.201367	2.87605	3.35774	-	-	-	-
		mu2-2	45.55	0.04	32.8	2.76	0.02	0.91	0.01	0.22	11.3	93.64	3.12659	2.6533	0.873412	1.77989	0.158414	0	0.158414	0.0930981	0.00206455	0.00116266	0.000735367	0.0292761	0.989395	0.629847	0.252675	2.81378	3.57974	292	384	0.966174	2.11893
		mu3	44.58	0.03	34.37	2.48	0	0.69	0.03	0.34	11.14	93.69	3.05473	2.7755	0.945275	1.83023	0.142098	0	0.142098	0.070469	0.00154574	0	0.00220229	0.0451668	0.973703	0.668485	0.212567	2.91915	3.23157	-	-	-	-
		mu4	45.35	0.04	32.81	2.6	0.04	0.88	0	0.25	11.15	93.15	3.12497	2.66444	0.875027	1.78941	0.149812	0	0.149812	0.0903793	0.00207258	0.00233436	0	0.0333978	0.98006	0.623719	0.242525	2.81632	3.57129	292	384	0.9222	2.07496
		mu5	45.04	0	35.76	1.93	0	0.56	0.02	0.59	10.79	94.69	3.03544	2.84021	0.964558	1.87566	0.108764	0	0.108764	0.0562508	0	0	0.00144403	0.0770875	0.927586	0.659116	0.165014	2.94898	3.14698	-	-	-	-
		mu6	45.49	0	36.06	1.87	0	0.56	0	0.5	11	95.5	3.0396	2.83959	0.960404	1.87919	0.104483	0	0.104483	0.0557706	0	0	0	0.0647707	0.937566	0.651985	0.160253	2.94407	3.16491	-	-	-	-
		mu7-1	44.88	0.03	36.66	0.92	0.01	0.72	0	0.37	11.05	94.69	3.01267	2.90015	0.987332	1.91282	0.0516404	0	0.0516404	0.0720357	0.00151427	0.000568509	0	0.0481514	0.946171	0.417545	0.124245	2.95331	3.05132	-	-	-	-
		mu7-2	45.19	0.02	35.55	1.9	0.03	0.48	0.08	0.33	10.6	94.19	3.05433	2.83167	0.945673	1.886	0.107382	0	0.107382	0.0483539	0.00101645	0.00171725	0.00579275	0.043241	0.913878	0.689513	0.157453	2.94007	3.22979	-	-	-	-
		mu8-2	46.29	0.05	35.66	1.84	0	0.67	0	0.42	10.54	95.48	3.07928	2.79559	0.920716	1.87488	0.102349	0	0.102349	0.0664285	0.00250101	0	0	0.0541652	0.89436	0.606414	0.168777	2.90044	3.34445	-	-	-	-
		mu9-1	45.26	0.02	36.7	0.65	0	0.71	0.03	0.57	10.33	94.27	3.03201	2.89742	0.967991	1.92943	0.036411	0	0.036411	0.070891	0.00100746	0	0.00215307	0.0740285	0.882725	0.339332	0.107302	2.93484	3.13227	-	-	-	-
		mu9-2	46.72	0	35.14	1.91	0.02	0.75	0.04	0.4	10.58	95.56	3.10584	2.75301	0.894164	1.85884	0.106173	0	0.106173	0.0743112	0	0.00112602	0.00284877	0.0515518	0.897161	0.588267	0.18161	2.85918	3.47345	292	384	0.400045	1.5528
		mu9-3	46.3	0.05	36.01	1.59	0.01	0.68	0.05	0.38	10.46	95.53	3.07221	2.81593	0.927795	1.88814	0.0882205	0	0.0882205	0.0672505	0.00249472	0.000561963	0.00355436	0.0488834	0.88534	0.56744	0.156033	2.90665	3.3113	-	-	-	-
		mu10-1	45.56	0.05	36.63	1.55	0.03	0.59	0.02	0.48	10.79	95.7	3.02784	2.86891	0.972159	1.89675	0.0861359	0	0.0861359	0.0584411	0.00249863	0.00168853	0.00142397	0.0618442	0.914702	0.595779	0.146266	2.95754	3.11455	-	-	-	-
		mu10-2	46.4	0.02	35.79	1.56	0.03	0.76	0	0.47	11.01	96.08	3.07399	2.79432	0.926009	1.86831	0.0864196	0	0.0864196	0.0750439	0.000996318	0.00168323	0	0.0603658	0.930424	0.535227	0.163147	2.88174	3.31961	-	-	-	-
		mu10-3	45.58	0.02	36.09	1.62	0.02	0.62	0	0.53	10.89	95.37	3.0434	2.83989	0.956597	1.8833	0.0904489	0	0.0904489	0.0617013	0.00100415	0.00113098	0	0.0686072	0.927517	0.594471	0.153281	2.93135	3.18149	-	-	-	-
		mu10-4	45.55	0	36.51	1.67	0	0.64	0	0.53	11.01	95.91	3.027	2.85934	0.972998	1.88635	0.0927992	0	0.0927992	0.0633901	0	0	0	0.0682824	0.933299	0.594146	0.156189	2.95214	3.11101	-	-	-	-
		mu10-5	45.83	0.05	36.35	1.58	0.04	0.69	0	0.34	11.15	96.04	3.04027	2.84182	0.959728	1.8821	0.0876441	0	0.0876441	0.0682227	0.00249411	0.0022473	0	0.043727	0.94351	0.562301	0.158114	2.93196	3.16785	-	-	-	-
		mu10-6	45.83	0.02	36.29	1.5	0.02	0.7	0	0.53	10.77	95.67	3.04538	2.8419	0.954617	1.88729	0.0833463	0	0.0833463	0.0693278	0.000999321	0.00112554	0	0.0682773	0.912887	0.54591	0.1538	2.92625	3.19016	-	-	-	-
		mu11-1	46.05	0.19	35.78	1.68	0.03	0.6	0	0.3	11.1	95.73	3.06386	2.8055	0.93614	1.86936	0.0934656	0	0.0934656	0.0594987	0.00950552	0.00169044	0	0.0386962	0.942044	0.611029	0.154655	2.90847	3.27286	-	-	-	-
		mu11-2	45.89	0.29	35.75	1.55	0.04	0.6	0.01	0.48	10.89	95.5	3.05824	2.80776	0.941761	1.866	0.086375	0	0.086375	0.0595966	0.0145323	0.00225763	0.000713962	0.0620159	0.925743	0.591725	0.148229	2.90866	3.24736	-	-	-	-
		mu11-3	45.29	0.17	36.13	1.64	0	0.61	0.01	0.45	10.81	95.12	3.03171	2.85025	0.968292	1.88196	0.0917978	0	0.0917978	0.06086	0.00855691	0	0.000717145	0.0583991	0.923038	0.60133	0.152658	2.95061	3.13099	-	-	-	-
		mu11-4	45.84	0.14	35.71	1.54	0.03	0.62	0	0.56	10.89	95.33	3.06078	2.81	0.939225	1.87078	0.0859826	0	0.0859826	0.0617015	0.00702907	0.00169647	0	0.0724909	0.927521	0.582206	0.149381	2.90301	3.25883	-	-	-	-
		mu11-5	45.86	0.2	36.51	1.58	0	0.55	0	0.54	10.69	95.95	3.03811	2.85044	0.961885	1.88856	0.0875246	0	0.0875246	0.0543063	0.00996284	0	0	0.0693541	0.903352	0.617106	0.141831	2.94793	3.1585	-	-	-	-
		mu1	45.64	0.03	31.89	3.31	0.16	1.22	0	0.16	11.34	93.76	3.13974	2.58543	0.860262	1.72517	0.190513	0	0.190513	0.125091	0.00155186	0.00932195	0	0.0213391	0.995107	0.603647	0.324926	2.77749	3.64975	292	384	1.32373	2.47649
		mu2-1	44.97	0.02	31.41	4.81	0.18	1.7	0.04	0.16	10.93	94.24	3.08422	2.53876	0.915776	1.62298	0.277605	0	0.277605	0.173776	0.00103142	0.0104552	0.00293904	0.0212741	0.956208	0.615013	0.461836	2.81739	3.36788	-	-	-	-
		mu2-2	46.18	0.03	32.11	2.61	0.06	1.12	0	0.18	11.19	93.48	3.16732	2.59543	0.832679	1.76275	0.149686	0	0.149686	0.114492	0.00154719	0.0034852	0	0.0239342	0.978988	0.566612	0.267663	2.74666	3.80377	292	384	2.07071	3.22347
		mu3	44.49	1	30.13	4.57	0.07	1.75	0.04	0.18	10.76	93.02	3.09392	2.46931	0.906077	1.56324	0.267203	0	0.267203	0.181385	0.0522914	0.00412272	0.00298009	0.0242677	0.954483	0.595653	0.452711	2.78881	3.41463	292	384	0.073994	1.22675
		mu4-1	41.19	0.77	31.93	4.75	0.05	1.19	0.04	0.32	10.47	90.72	2.94589	2.69125	1.05411	1.63714	0.285933	0	0.285933	0.12685	0.0414094	0.00302854	0.00306484	0.0443694	0.955171	0.692696	0.415811	3.01859	2.79468	-	-	-	-
		mu4-2	42.07	0.73	32.32	5	0.01	1.11	0	0.42	10.34	92	2.96129	2.68108	1.03871	1.64238	0.296296	0	0.296296	0.116453	0.038638	0.000596139	0	0.0573148	0.928407	0.717861	0.413345	3.01602	2.85094	-	-	-	-
		mu4-3	43.39	1.42	31.62	4.52	0.05	1.06	0	0.25	10.55	92.86	3.02104	2.59453	0.978964	1.61556	0.264499	0	0.264499	0.109999	0.0743426	0.00294832	0	0.0337454	0.936974	0.706276	0.377447	2.93337	3.08595	-	-	-	-
		mu4-4	43.38	0.62	32.48	4.95	0.05	1.09	0.03	0.39	10.36	93.36	3.00157	2.64853	0.998429	1.6501	0.288289	0	0.288289	0.112409	0.0322577	0.00293	0.00222383	0.0523157	0.914382	0.719467	0.403629	2.96908	3.0063	-	-	-	-
		mu4-5	44.26	0.39	32.01	4.57	0	1.09	0.03	0.29	10	92.68	3.06598	2.6132	0.934023	1.67918	0.266333	0	0.266333	0.112538	0.0203145	0	0.00222639	0.0389461	0.883622	0.702964	0.378871	2.89985	3.28255	-	-	-	-
		mu4-6	44.12	0.59	31.87	4.83	0.04	1.1	0	0.31	10.77	93.62	3.0478	2.59456	0.952201	1.64236	0.280564	0	0.280564	0.113256	0.0306469	0.00234018	0	0.0415165	0.949021	0.712417	0.39616	2.90577	3.2008	-	-	-	-
		mu5-1	46.49	0.24	30.97	4.16	0.04	1.48	0	0.25	10.99	94.63	3.16794	2.48707	0.832059	1.65502	0.237578	0	0.237578	0.150313	0.0122974	0.00230843	0	0.0330268	0.955266	0.612487	0.390199	2.73695	3.80735	292	384	2.08744	3.2402
		mu5-2	46.62	0.22	31.19	3.39	0.04	1.4	0	0.29	10.92	94.08	3.18698	2.51277	0.81302	1.69975	0.193784	0	0.193784	0.142644	0.0113087	0.00231583	0	0.0384338	0.952223	0.576005	0.338743	2.71786	3.91993	292	384	2.6006	3.75336
		mu5-3	46.26	0.25	31.13	3.98	0.02	1.42	0	0.22	10.83	94.11	3.16282	2.50829	0.837182	1.67111	0.228077	0	0.228077	0.144702	0.0128526	0.00115808	0	0.0291608	0.944509	0.61183	0.373937	2.74922	3.77793	292	384	1.94902	3.10178
		mu5-4	44.37	1.26	30.21	4.6	0.03	1.27	0.01	0.22	10.82	92.78	3.1013	2.48849	0.898695	1.58979	0.26962	0	0.26962	0.132305	0.066223	0.00177589	0.000748819	0.0298116	0.964698	0.670822	0.403701	2.82433	3.4509	292	384	0.276111	1.42887
		mu5-6	43.56	1.03	31.64	5.01	0	1.1	0.02	0.35	10.55	93.28	3.02312	2.58782	0.97688	1.61094	0.292551	0	0.292551	0.113783	0.0537512	0	0.00148703	0.0470917	0.933962	0.719976	0.406334	2.93412	3.09467	-	-	-	-
		mu5-7	44.44	0.06	31.65	4.28	0	1.28	0	0.22	10.83	92.76	3.08837	2.59214	0.911631	1.68051	0.249911	0	0.249911	0.132581	0.00313538	0	0	0.0296405	0.960047	0.653375	0.382492	2.84519	3.38774	-	-	-	-
		mu5-8	43.57	1.29	31.5	4.01	0.03	1.23	0	0.13	10.76	92.52	3.04073	2.59078	0.95927	1.63151	0.234984	0	0.234984	0.127942	0.067696	0.00177317	0	0.017589	0.957881	0.647471	0.364699	2.89346	3.16984	-	-	-	-
		mu6-1	44.74	0.09	34.19	3.01	0.05	1.67	0.01	0.24	10.62	94.62	3.02382	2.72326	0.97618	1.74708	0.170776	0	0.170776	0.168226	0.00457389	0.00286199	0.000724072	0.031447	0.915574	0.50376	0.341864	2.89861	3.09761	-	-	-	-
		mu6-2	46.56	0.12	33.76	2.59	0.05	1.36	0	0.18	11.23	95.85	3.10864	2.65638	0.891356	1.76503	0.144775	0	0.144775	0.135336	0.00602452	0.00282727	0	0.0232991	0.956416	0.516848	0.282938	2.80718	3.48754	292	384	0.476775	1.62953
		mu7-1	44.68	0.04	32.27	4.14	0.07	1.39	0.01	0.19	11.29	94.1	3.06759	2.61104	0.932413	1.67862	0.238815	0	0.238815	0.142238	0.00206503	0.00407024	0.000735539	0.0252898	0.98875	0.626724	0.385123	2.85192	3.28994	-	-	-	-
		mu7-2	47.09	0.04	31.59	3.02	0.1	1.35	0.02	0.17	11.16	94.59	3.19728	2.52774	0.802718	1.72502	0.17146	0	0.17146	0.136616	0.00204219	0.00575031	0.0014548	0.0223774	0.966552	0.55655	0.313827	2.70124	3.98307	292	384	2.87744	4.0302
		mu7-3	46.92	0.01	33.05	3.44	0.06	1.44	0.02	0.17	11.17	96.34	3.12541	2.59448	0.874593	1.71989	0.192158	0	0.192158	0.142965	0.000500878	0.00338484	0.00142725	0.0219536	0.949097	0.573396	0.338507	2.78714	3.57356	292	384	0.934025	2.08678
		mu1	47.52	0.22	31.21	2.41	0.02	2.12	0.01	0.18	10.92	94.62	3.20737	2.48254	0.792634	1.6899	0.136092	0	0.136092	0.213268	0.0111655	0.00114325	0.000723093	0.0235534	0.940164	0.389548	0.350503	2.6298	4.04647	292	384	3.14791	4.30067
		mu2	47.32	0.25	29.37	2.62	0.07	2.22	0	0.15	10.68	92.69	3.26446	2.38781	0.735544	1.65227	0.151137	0	0.151137	0.228263	0.0129685	0.00408981	0	0.0200616	0.939824	0.398357	0.38349	2.55192	4.43815	292	384	4.66875	5.82151
		mu3	46.31	0.3	29.74	4.42	0.06	1.93	0.09	0.14	10.69	93.69	3.18343	2.4093	0.816573	1.59273	0.255185	0	0.255185	0.19774	0.0155069	0.00349309	0.00662803	0.0186576	0.937361	0.563415	0.456418	2.67999	3.89852	292	384	2.50497	3.65773
		mu4	46.66	0.33	30.29	3.6	0.02	1.82	0.08	0.1	10.81	93.71	3.19834	2.44686	0.801655	1.64521	0.206726	0	0.206726	0.185938	0.017009	0.00116105	0.00587479	0.0132889	0.945182	0.526469	0.393825	2.6706	3.98968	292	384	2.90597	4.05873
		mu5	48.16	0.18	28.54	3.87	0.08	2.17	0.05	0.09	10.7	93.84	3.29561	2.30162	0.704394	1.59722	0.221722	0	0.221722	0.221323	0.00926199	0.00463636	0.00366556	0.0119399	0.933989	0.500451	0.447681	2.5326	4.67864	292	384	5.49121	6.64397
		mu6	46.26	0.34	29.87	3.89	0.04	1.72	0.01	0.1	10.98	93.25	3.1988	2.43414	0.801203	1.63294	0.225325	0	0.225325	0.177266	0.0176784	0.0023425	0.000740803	0.0134057	0.968484	0.559686	0.404934	2.67715	3.99249	292	384	2.91812	4.07088
		mu7	47.46	0.43	30.42	3.2	0.02	1.57	0.03	0.11	10.76	94	3.23506	2.44368	0.764943	1.67873	0.182393	0	0.182393	0.159504	0.0220397	0.00115458	0.00219077	0.0145363	0.935568	0.533473	0.343051	2.64811	4.22915	292	384	3.88775	5.04051
		mu8	47.16	0.2	31.69	1.92	0	1.73	0.02	0.19	10.79	93.7	3.20396	2.53726	0.796041	1.74122	0.109073	0	0.109073	0.175177	0.0102171	0	0.00145568	0.0250251	0.935069	0.383723	0.28425	2.65655	4.02487	292	384	3.05659	4.20935
		mu9	47.26	0.21	30.3	2.62	0.04	2.04	0.08	0.11	10.77	93.43	3.23446	2.44389	0.765536	1.67835	0.149938	0	0.149938	0.208092	0.0108071	0.0023185	0.00586571	0.0145952	0.940228	0.418787	0.360349	2.60463	4.22509	292	384	3.87194	5.0247
		mu10	45.25	0.18	30.71	3.64	0.04	1.64	0.05	0.14	10.88	92.54	3.1475	2.51743	0.852503	1.66492	0.212296	0	0.212296	0.170023	0.00941461	0.00235638	0.00372596	0.0188792	0.96535	0.555285	0.384675	2.73914	3.69206	292	384	1.53425	2.68701
		mu11-1	46.73	0.18	30.41	4.04	0.02	1.87	0.01	0.14	11.14	94.54	3.18531	2.44288	0.814686	1.6282	0.230921	0	0.230921	0.189983	0.00922597	0.00115458	0.000730261	0.0185009	0.968614	0.54863	0.422058	2.68303	3.90987	292	384	2.55576	3.70852
		mu11-2	46.47	0.18	29.83	4.67	0.08	1.93	0	0.17	11.06	94.4	3.18018	2.40582	0.819817	1.586	0.26845	0	0.26845	0.196858	0.00926265	0.00463669	0	0.0225547	0.965481	0.576929	0.469945	2.68353	3.87914	292	384	2.41761	3.57037
		mu11-3	46.8	0.15	30.75	4.05	0.02	1.77	0	0.1	11.04	94.68	3.17982	2.46225	0.820179	1.64207	0.230858	0	0.230858	0.179245	0.00766357	0.00115087	0	0.0131724	0.95683	0.562927	0.411254	2.70077	3.87698	292	384	2.40785	3.56061
		mu12-1	46.11	0.34	30.1	4.29	0.05	1.88	0.13	0.11	10.65	93.67	3.1676	2.43687	0.832396	1.60447	0.247535	0	0.247535	0.192491	0.017563	0.002909	0.00956756	0.01465	0.933242	0.562546	0.442935	2.70197	3.8054	292	384	2.07833	3.23109
		mu12-2	46.06	0.08	30.85	4.37	0.01	1.63	0.1	0.12	10.79	94.01	3.15339	2.48908	0.846612	1.64247	0.251265	0	0.251265	0.166325	0.00411838	0.000579819	0.00733458	0.0159273	0.942289	0.601702	0.41817	2.74446	3.72471	292	384	1.69389	2.84665
		mu12-3	46.23	0.32	31.29	3.57	0	1.6	0.07	0.13	11.02	94.23	3.15559	2.51706	0.844405	1.67265	0.204142	0	0.204142	0.162778	0.0164244	0	0.00511891	0.0172032	0.959507	0.556368	0.36692	2.73762	3.73706	292	384	1.75364	2.9064
		mu12-4	46.5	0.1	30.84	4.08	0.04	1.79	0.03	0.1	10.97	94.47	3.16614	2.47469	0.83386	1.64083	0.233228	0	0.233228	0.181655	0.00511989	0.00230662	0.00218837	0.0132004	0.95278	0.562154	0.41719	2.71304	3.79697	292	384	2.03878	3.19155
		mu13	50.15	0.1	28.89	3.23	0.03	1.33	0.08	2.16	9.24	95.21	3.35754	2.27944	0.642464	1.63697	0.180824	0	0.180824	0.132715	0.00503423	0.00170102	0.00573802	0.280357	0.789098	0.57672	0.315239	2.46529	5.22603	292	384	7.11093	8.26369
		mu14-1	45.68	0.33	32.38	3.58	0.05	1.11	0	0.14	10.86	94.16	3.11657	2.6035	0.883433	1.72007	0.204721	0	0.204721	0.112873	0.0169296	0.00288908	0	0.0185177	0.945125	0.644599	0.320483	2.82515	3.52779	292	384	0.693087	1.84585
		mu14-2	46.15	0.44	30.79	4.33	0.04	1.69	0	0.12	10.89	94.46	3.14641	2.47391	0.853589	1.62032	0.247952	0	0.247952	0.171731	0.0225569	0.00230963	0	0.0158611	0.947067	0.590808	0.421992	2.74442	3.6861	292	384	1.50481	2.65757
		mu15	45.08	1.11	31.64	3.59	0.05	1.12	0	0.2	10.85	93.65	3.10389	2.56737	0.896113	1.67126	0.206913	0	0.206913	0.114936	0.0574683	0.00291562	0	0.0266969	0.952929	0.642888	0.324765	2.83175	3.46372	292	384	0.346744	1.4995
		mu16-1	44.95	0.04	31.48	5.17	0	1.32	0.05	0.24	10.64	93.89	3.0891	2.54957	0.910895	1.63868	0.299134	0	0.299134	0.135205	0.00206703	0	0.00368125	0.0319759	0.932725	0.688711	0.43434	2.85078	3.39129	-	-	-	-
		mu16-2	46.36	0.07	32.47	3.5	0	1.12	0	0.17	11.01	94.72	3.14368	2.59482	0.856321	1.7385	0.198715	0	0.198715	0.113196	0.00356924	0	0	0.0223487	0.952338	0.637089	0.31191	2.7971	3.67115	292	384	1.4307	2.58346
		mu16-3	46.04	0.8	30.59	4.81	0.04	1.74	0	0.13	11.01	95.19	3.12604	2.44776	0.873963	1.57379	0.274533	0	0.274533	0.176086	0.0408443	0.00230016	0	0.0171124	0.953576	0.609235	0.452919	2.76313	3.57685	292	384	0.951176	2.10394
		mu16-4	46.44	0.01	31.49	4.35	0.02	1.33	0.03	0.24	10.74	94.65	3.15567	2.52175	0.844333	1.67742	0.248037	0	0.248037	0.1347	0.000510954	0.00115098	0.00218395	0.0316168	0.93092	0.648061	0.383888	2.7703	3.73747	292	384	1.7556	2.90836
		mu16-5	47.11	0.09	29.14	5.51	0.05	2.27	0	0.15	11.09	95.4	3.19411	2.32839	0.805889	1.5225	0.314558	0	0.314558	0.229393	0.00458841	0.00287108	0	0.0197168	0.95913	0.578284	0.546821	2.64754	3.96346	292	384	2.79228	3.94504
		mu17-1	44.46	0.1	31.17	5.9	0.05	1.47	0	0.18	10.81	94.15	3.06327	2.53095	0.936727	1.59422	0.342589	0	0.342589	0.150956	0.00518083	0.00291759	0	0.0240435	0.95006	0.694139	0.496463	2.87872	3.27019	-	-	-	-
		mu17-2	45.01	0.11	31.99	3.95	0.02	1.31	0	0.23	10.7	93.32	3.09914	2.59583	0.900862	1.69497	0.228425	0	0.228425	0.134437	0.00569518	0.00116627	0	0.0307021	0.939777	0.629509	0.364029	2.82995	3.44019	292	384	0.216818	1.36958
		mu17-3	44.7	0.01	32.86	3.65	0.02	1.17	0	0.22	10.82	93.47	3.07109	2.66062	0.928908	1.73171	0.21058	0	0.21058	0.119809	0.000516617	0.00116374	0	0.0293033	0.948247	0.637371	0.331553	2.87172	3.30613	-	-	-	-
	Serrinha de Matupá	IIIA,11,3	46.37	0.19	26.77	6.78	0.04	2.94	0.04	0.12	10.73	94.45	3.23985	2.20428	0.76015	1.44413	0.396114	0	0.396114	0.306163	0.00998216	0.00236694	0.00299412	0.0162546	0.956305	0.564043	0.704644	2.61037	4.26212	192	356	2.76639	4.82131	Moura 1998
		IIIA,14,1	44.19	1.52	29.91	5.42	0.06	0.58	0.04	0.4	10.2	92.4	3.1175	2.48673	0.882496	1.60424	0.319731	0	0.319731	0.0609857	0.0806324	0.00358487	0.00302319	0.0547081	0.917893	0.839814	0.384302	2.8871	3.5326	-	-	-	-
		IIIA,14,3	45.87	0.81	28.74	4.91	0.03	2.05	0.03	0.23	10.61	93.56	3.19405	2.35847	0.805951	1.55252	0.285889	0	0.285889	0.212757	0.0424112	0.00176918	0.00223798	0.0310491	0.942404	0.573331	0.500415	2.68677	3.96308	192	356	1.42881	3.48373
		IIA,6,1	45.35	0.29	33.96	2.77	0.06	0.48		0.43	10.77	94.27	3.08814	2.72532	0.911859	1.81346	0.157726	0	0.157726	0.0487167	0.0148491	0.00346027	0	0.0567671	0.935502	0.764018	0.209903	2.8979	3.38665	-	-	-	-
		ПА,8,6	45.39	0.78	29.06	4.61	0.04	1.53	0.06	0.19	10.69	92.79	3.18914	2.40624	0.81086	1.59538	0.270843	0	0.270843	0.160222	0.0412089	0.00238019	0.00451634	0.0258807	0.958076	0.628311	0.433445	2.71829	3.93304	192	356	1.42881	3.48373
		IIA,8,7	45.22	0.24	33.27	4		0.12	0.01	0.32	10.75	94.24	3.10277	2.69031	0.89723	1.79308	0.2295	0	0.2295	0.0122721	0.0123826	0	0.000735091	0.0425674	0.940885	0.949241	0.241772	2.93219	3.45817	-	-	-	-
		IIA,11,1	45.47	0.5	29.97	4.81	0.03	1.55		0.35	10.49	93.33	3.16445	2.45805	0.835546	1.6225	0.279912	0	0.279912	0.160777	0.0261654	0.00176821	0	0.0472226	0.931233	0.63517	0.442457	2.76413	3.78729	192	356	0.619832	2.67475
		IIA,11,2	45.01	0.3	29.35	4.9	0.05	1.72	0.07	0.31	10.48	92.57	3.17139	2.43713	0.828606	1.60853	0.288696	0	0.288696	0.180629	0.0158945	0.00298366	0.00528398	0.0423459	0.941915	0.61513	0.472308	2.74172	3.82738	192	356	0.890026	2.94495
		IIA,11,4	45.67	0.2	33.59	2.49	0.03	0.69	0.02	0.29	11.19	94.22	3.10882	2.69467	0.891177	1.80349	0.141732	0	0.141732	0.0700053	0.0102371	0.00172952	0.00145854	0.0382711	0.971637	0.669376	0.213467	2.84664	3.48845	-	-	-	-
		IIC2,5	46.83	0.16	34.51	2.23		0.88		0.23	10.96	96.12	3.11642	2.7065	0.883575	1.82292	0.124091	0	0.124091	0.0872835	0.00800637	0	0	0.0296735	0.930362	0.587067	0.211375	2.83859	3.52706	-	-	-	-
		IID,11,2	46.9	0.08	29.19	5.19	0.04	2.06		0.22	10.95	94.91	3.22111	2.36264	0.778888	1.58375	0.29806	0	0.29806	0.210871	0.00413148	0.00232665	0	0.029293	0.959304	0.585659	0.511258	2.66483	4.13553	192	356	2.23296	4.28788
		IID,11,3	45.72	0.28	30.46	5.36	0.05	1.66		0.2	10.78	95.34	3.14769	2.47141	0.852314	1.6191	0.30857	0	0.30857	0.170338	0.0144953	0.00291537	0	0.0266946	0.946701	0.64432	0.481822	2.79448	3.6931	192	356	0.349102	2.40402
		IIP	46.29	0.09	34.59	1.98	0.06	0.65		0.23	11.05	95.33	3.10846	2.7374	0.891538	1.84587	0.11118	0	0.11118	0.0650562	0.00454448	0.00341231	0	0.0299429	0.94652	0.630858	0.179649	2.85313	3.48663	-	-	-	-
		IIP	45.63	0.1	37.47	0.89	0.03	0.08		0.28	10.82	95.94	3.02898	2.9313	0.97102	1.96028	0.0494014	0	0.0494014	0.00791504	0.00499148	0.00168658	0	0.036034	0.916183	0.861906	0.059003	2.98569	3.11938	-	-	-	-
		IIP,2,8	47.14	0.1	32.38	2.15	0.04	1.54	0.01	0.29	10.65	94.57	3.18354	2.57708	0.816458	1.76062	0.121412	0	0.121412	0.15501	0.00507813	0.00228781	0.000723507	0.0379688	0.917444	0.439228	0.27871	2.70357	3.89921	192	356	1.15969	3.21461
		IIP	46.03	0.05	29.23	5.59	0.06	2.7		0.15	10.94	95.08	3.17093	2.37304	0.829071	1.54397	0.322003	0	0.322003	0.277221	0.00258999	0.00350054	0	0.020033	0.961329	0.537367	0.602725	2.69763	3.82468	192	356	0.890026	2.94495
		IIP	45.43	0.07	36.93	0.89	0.02	0.27	0.03	0.26	10.88	95.16	3.03538	2.9079	0.964624	1.94327	0.0497236	0	0.0497236	0.0268875	0.00351683	0.00113172	0.0021474	0.0336784	0.927273	0.649039	0.0777429	2.96114	3.1467	-	-	-	-
		IIP	47.15	0.24	29.21	5.89		2.1	0	0.15	10.97	96.03	3.21157	2.34476	0.788426	1.55633	0.335471	0	0.335471	0.213193	0.0122922	0	0	0.0198078	0.953129	0.611432	0.548664	2.69252	4.0734	192	356	1.96545	4.02037
		IIP,4	46.73	0.19	30.56	4.32		1.83	0.02	0.22	10.86	95.25	3.1874	2.45654	0.812596	1.64395	0.246393	0	0.246393	0.186041	0.00974491	0	0.00146148	0.0290919	0.944888	0.569781	0.432434	2.71268	3.92249	192	356	1.42881	3.48373
		IID,4,	46.44	0.25	29.51	5.48	0.03	2.1	0	0.16	10.97	95.54	3.18654	2.38631	0.813457	1.57285	0.314421	0	0.314421	0.214765	0.0128988	0.00174336	0	0.0212841	0.960159	0.594159	0.530929	2.71363	3.91729	192	356	1.42881	3.48373
		IIP	47.29	0.23	29.87	4.39	0.05	1.82		0.17	11.02	95.37	3.22403	2.39991	0.775969	1.62394	0.250264	0	0.250264	0.184935	0.0117907	0.00288695	0	0.0224692	0.958342	0.575056	0.438085	2.66197	4.15484	192	356	2.23296	4.28788
		IIP	45.55	0.23	30.7	5.06		1.6	0	0.23	10.73	94.56	3.14339	2.49677	0.856614	1.64015	0.291987	0	0.291987	0.164568	0.0119349	0	0	0.0307713	0.944535	0.639543	0.456555	2.80069	3.66955	192	356	0.077835	2.13275
		IIP	47.32	0.07	29.04	5.56	0.09	2.02		0.16	10.96	95.58	3.2338	2.33881	0.766198	1.57262	0.317722	0	0.317722	0.205749	0.00359708	0.00520895	0	0.0211981	0.955407	0.606952	0.528679	2.66013	4.22059	192	356	2.49994	4.55486
		IIP	45.29	0.4	30.62	5.15		1.74	0	0.23	10.76	95.56	3.12746	2.49187	0.872541	1.61932	0.297372	0	0.297372	0.179084	0.0207698	0	0	0.0307911	0.947787	0.624134	0.476455	2.81001	3.58431	-	-	-	-
		IIP,2,4	46.69	0.39	29.54	5.34	0.06	1.78		0.16	10.81	95.08	3.20184	2.38735	0.798159	1.58919	0.306211	0	0.306211	0.181934	0.0201105	0.0034847	0	0.0212718	0.945607	0.627295	0.491629	2.71367	4.01153	192	356	1.6974	3.75232
		IIP,2,5	46.42	0.56	28.99	5.62	0.06	2	0.01	0.15	10.73	94.83	3.19817	2.35383	0.801829	1.552	0.32377	0	0.32377	0.205373	0.0290113	0.00350095	0.000738106	0.0200353	0.942986	0.611876	0.532644	2.70661	3.98859	192	356	1.6974	3.75232
		I11,3,7	46.76	0.39	26.49	6.57	0.08	3.05	0.23	0.04	10.5	94.23	3.25496	2.17312	0.745044	1.42807	0.382419	0	0.382419	0.316437	0.0204135	0.00471628	0.0171522	0.00539808	0.932329	0.547207	0.703572	2.57595	4.36881	192	356	3.0323	5.08722
		I11,3,10	48.31	0.18	27.09	5.39	0.08	2.44	0.05	0.05	11.26	95.03	3.31563	2.19113	0.684369	1.50676	0.309329	0	0.309329	0.249595	0.00928934	0.00465005	0.00367639	0.00665285	0.985772	0.553437	0.563574	2.50975	4.8448	192	356	4.87866	6.93358
		I11,1,1	46.17	0.12	32.52	2.86	0.05	1.33	0	0.2	10.91	94.47	3.14323	2.60913	0.856775	1.75236	0.162811	0	0.162811	0.134954	0.00614299	0.00288287	0	0.026397	0.947435	0.546778	0.300648	2.77809	3.66867	192	356	0.077835	2.13275
		I11,8,4	48.07	0.3	27.62	4.68	0.03	2.4	0.07	0.14	11.09	94.57	3.30035	2.23481	0.699646	1.53516	0.26868	0	0.26868	0.245592	0.0154878	0.0017444	0.0051488	0.0186347	0.971241	0.522447	0.516017	2.51898	4.71718	192	356	4.35381	6.40873
		I11,8,5	47.82	0.3	27.52	5.59	0.07	2.35	0.03	0.08	11.32	95.23	3.28136	2.22548	0.718637	1.50684	0.320745	0	0.320745	0.240342	0.0154792	0.00406801	0.0022054	0.0106425	0.990832	0.571649	0.565155	2.5617	4.5661	192	356	3.82681	5.88173
		I12,9,3	47.75	0.21	31.27	2.98	0.09	1.93	0.02	0.14	10.57	95.33	3.21378	2.48028	0.786216	1.69407	0.167711	0	0.167711	0.193605	0.0106279	0.00513008	0.0014421	0.0182675	0.90746	0.464167	0.366447	2.65862	4.08766	192	356	1.96545	4.02037
		I12,9,4	47.31	0.23	32.66	2.33	0.01	1.67	0.02	0.16	10.3	94.85	3.17532	2.58333	0.824683	1.75865	0.130766	0	0.130766	0.167058	0.0116077	0.000568425	0.00143809	0.0208191	0.881821	0.43907	0.298392	2.72571	3.85035	192	356	1.15969	3.21461
		I12,7,1	45.5	0.38	30.52	2.53	0	1.96	0.06	0.2	10.75	92.19	3.17426	2.50926	0.825739	1.68352	0.147589	0	0.147589	0.2038	0.0199342	0	0.0044844	0.0270501	0.95664	0.420016	0.351389	2.67678	3.84414	192	356	0.890026	2.94495
		I12,7,2	48.22	0.37	32.18	2.41		2.17	0.01	0.18	10.55	96.25	3.19441	2.51235	0.805586	1.70676	0.133501	0	0.133501	0.21426	0.018431	0	0.000709718	0.0231177	0.891509	0.383887	0.347761	2.66428	3.96533	192	356	1.42881	3.48373
		1112,6,1	46.77	0.23	29.03	4.91	0.07	2.32		0.25	10.84	94.78	3.21579	2.35232	0.784212	1.56811	0.282296	0	0.282296	0.237753	0.0118913	0.00407621	0	0.0333249	0.950733	0.542826	0.524125	2.64651	4.10066	192	356	2.23296	4.28788
		1112,6,2	45.76	0.47	29.39	5.57	0.04	1.74		0.25	10.93	94.63	3.17218	2.40106	0.827815	1.57324	0.322872	0	0.322872	0.179779	0.0244993	0.0023484	0	0.0335986	0.9665	0.642339	0.505	2.74843	3.832	192	356	0.890026	2.94495
		1112,6,3	45.84	0.61	29.78	5.19	0.09	1.62		0.34	10.79	94.41	3.16569	2.4237	0.834312	1.58938	0.299705	0	0.299705	0.166746	0.0316764	0.00526386	0	0.0455209	0.950504	0.642522	0.471715	2.75508	3.79437	192	356	0.890026	2.94495
		II12,6,4	46.01	0.41	29.29	5.51	0.12	1.75		0.3	10.9	94.83	3.1836	2.38845	0.816399	1.57205	0.318802	0	0.318802	0.180477	0.0213321	0.00703212	0	0.0402435	0.962059	0.638525	0.506311	2.72858	3.89956	192	356	1.15969	3.21461
		II12,6,13	46.48	0.07	29.8	4.75	0.03	1.94	0.02	0.16	11.16	94.77	3.19695	2.41555	0.803048	1.6125	0.273191	0	0.273191	0.198879	0.00362036	0.00174755	0.00147374	0.0213353	0.979136	0.578709	0.473818	2.69236	3.98102	192	356	1.6974	3.75232
		II12,6,14	46.99		30.28	4.07	0.06	1.79		0.16	11.21	94.67	3.21181	2.4391	0.788192	1.65091	0.232617	0	0.232617	0.182354	0	0.00347323	0	0.0212018	0.977369	0.560563	0.418444	2.67172	4.07491	192	356	1.96545	4.02037
		II12,8,3	46.33	0.33	30.08	4.76	0.09	1.55		0.21	10.77	94.39	3.18978	2.44066	0.810217	1.63044	0.274037	0	0.274037	0.159055	0.0170842	0.00524783	0	0.0280302	0.945853	0.632745	0.43834	2.73178	3.93695	192	356	1.42881	3.48373
		II12,8,4	45.35	0.7	30.34	4.55	0.05	1.32		0.3	10.83	93.56	3.14933	2.48306	0.85067	1.63239	0.264214	0	0.264214	0.136626	0.0365529	0.00294069	0	0.0403897	0.959353	0.659151	0.40378	2.78382	3.70217	192	356	0.349102	2.40402
		II12,8,5	48.55	0.02	28.89	3.48	0.03	2.39	0.03	0.08	10.86	94.79	3.30203	2.31563	0.697974	1.61765	0.197913	0	0.197913	0.242274	0.00102283	0.00172803	0.00218592	0.0105485	0.942172	0.449611	0.441914	2.51456	4.73087	192	356	4.35381	6.40873
		II12,8,6	48.5	0.02	28.61	4.04		2.36		0.1	10.94	94.96	3.30186	2.29544	0.698138	1.5973	0.229986	0	0.229986	0.239467	0.00102384	0	0	0.0131985	0.950044	0.489902	0.469454	2.52645	4.72953	192	356	4.35381	6.40873
		II13,1,4	46.78	0.31	29.94	4.8	0.09	1.25	0.04	0.13	11.07	94.58	3.21342	2.42375	0.786584	1.63717	0.275709	0	0.275709	0.127978	0.0160122	0.00523586	0.00294367	0.0173124	0.969981	0.682978	0.408923	2.71548	4.08528	360	380	4.16192	4.41252
		II13,1,5	46.22	0.2	29.8	4.74	0.13	1.3	0.08	0.11	10.65	93.33	3.2094	2.4386	0.790598	1.648	0.275217	0	0.275217	0.134541	0.0104426	0.00764498	0.00595122	0.014808	0.943306	0.671658	0.417403	2.72426	4.05946	360	380	4.05447	4.30507
		II13,1,6	46.26	0.14	30.39	3.99	0.13	1.11	0.03	0.16	11.06	93.35	3.20452	2.48095	0.795483	1.68546	0.231118	0	0.231118	0.114603	0.00729236	0.00762674	0.00222638	0.0214875	0.977285	0.668509	0.353348	2.71936	4.02839	360	380	3.92357	4.17417
		II13,1,7	47.65	0.13	30.59	3.57	0.03	1.33	0.04	0.14	10.93	94.6	3.24122	2.4522	0.758775	1.69342	0.203057	0	0.203057	0.134839	0.00664925	0.00172825	0.00291493	0.0184622	0.948365	0.600945	0.339624	2.66191	4.27165	360	380	4.90403	5.15463
		II13,1,8	47.33	0.3	31.08	3.82	0.02	1.29		0.11	10.9	94.93	3.20891	2.48331	0.791094	1.69222	0.216564	0	0.216564	0.130355	0.0152941	0.00114839	0	0.0144584	0.942662	0.62425	0.348068	2.71517	4.05629	360	380	4.0412	4.2918
		II13,1,8	46.83	0.38	31.04	3.74	0.03	1.15	0.01	0.16	10.6	94.08	3.20164	2.50092	0.79836	1.70256	0.213808	0	0.213808	0.117183	0.0195351	0.00173703	0.000732437	0.0212069	0.924407	0.645963	0.332727	2.73426	4.01027	360	380	3.84644	4.09703
		II13,2,1	46.81	0.54	27.72	5.88	0.08	2.53	0	0.16	10.74	94.55	3.23447	2.25729	0.76553	1.49176	0.339739	0	0.339739	0.260557	0.028057	0.00468159	0	0.0214335	0.946625	0.565953	0.604977	2.62509	4.22514	360	380	4.72416	4.97476
		II13,2,2	46.99	0.02	30.74	3.7	0.04	1.35	0.09	0.27	10.91	94.19	3.21435	2.47811	0.785652	1.69246	0.211637	0	0.211637	0.137638	0.00102873	0.00231732	0.00659556	0.0358063	0.951966	0.605933	0.351593	2.69078	4.09131	360	380	4.18687	4.43747
		II13,3,1	46.21	0.69	29.11	5.44	0.11	1.8		0.28	10.85	94.85	3.18823	2.36693	0.811769	1.55517	0.313846	0	0.313846	0.185099	0.035797	0.00642755	0	0.0374525	0.954888	0.629019	0.505372	2.71658	3.92751	360	380	3.48629	3.73689
		II13,3,2	46.48	0.39	28.68	5.7	0.11	2.05		0.24	10.85	94.58	3.20928	2.33373	0.790724	1.543	0.329093	0	0.329093	0.210966	0.0202483	0.00643239	0	0.0321263	0.955608	0.609365	0.546491	2.68307	4.05866	360	380	4.05111	4.30171
		II13,3,3	46.43	0.48	28.67	5.39	0.11	2.07	0.01	0.18	11.03	94.51	3.20873	2.33503	0.791268	1.54376	0.311478	0	0.311478	0.213217	0.0249436	0.00643823	0.000740383	0.0241166	0.972343	0.593636	0.531133	2.67145	4.05518	360	380	4.03653	4.28713
		II13,3,4	47.14	0.17	30.1	4.35	0.01	1.41	0.14	10.97	0.01	94.5	3.15639	2.37519	0.843608	1.53158	0.243553	0	0.243553	0.140714	0.00855921	0.000567075	0.0100427	1.42402	0.000854103	0.633812	0.384834	2.6273	3.74154	-	-	-	-
		II13,3,5	47.21	0.31	31.53	3.72	0.04	0.87	0.02	0.15	11.31	95.23	3.19684	2.51617	0.803161	1.71301	0.210636	0	0.210636	0.0878058	0.0157845	0.00229396	0.0014509	0.0196918	0.976918	0.705786	0.300736	2.7426	3.98032	360	380	3.71758	3.96818
		II13,1,16	46.53	0.37	31.05	5.09	0.05	1.35	0.21	11.05		95.72	3.08793	2.42843	0.912074	1.51636	0.282459	0	0.282459	0.133532	0.0184637	0.00281023	0.0149305	1.42169	0	0.679003	0.418801	2.72935	3.38561	-	-	-	-
		II13,1,17	46.02	0.37	30.47	5.21	0.01	1.16	0.02	0.21	10.56	94.26	3.17352	2.47626	0.826482	1.64978	0.300424	0	0.300424	0.119226	0.0191858	0.000584027	0.00147756	0.0280751	0.928896	0.715893	0.420234	2.79587	3.83979	360	380	3.08999	3.34059
		II13,1,18	46.99	0.33	31	3.48	0.09	1.01		0.14	11.14	94.46	3.21032	2.49594	0.789679	1.70627	0.198804	0	0.198804	0.102845	0.0169527	0.00520744	0	0.018543	0.970817	0.659058	0.306856	2.7117	4.06535	360	380	4.07909	4.32969
		II3,1,19	46.68	0.37	31.43	3.61	0	1.09	0.03	0.18	10.89	94.3	3.18393	2.52643	0.816068	1.71036	0.205894	0	0.205894	0.110809	0.0189766	0	0.00219218	0.023802	0.94748	0.650116	0.316703	2.7513	3.90155	360	380	3.37061	3.62121
		II13,1,20	46.31	0.44	27.88	4.94	0.17	2.03	0.01	0.17	10.99	93.15	3.24358	2.3013	0.756421	1.54488	0.289321	0	0.289321	0.211916	0.0231732	0.0100841	0.000750363	0.0230838	0.981876	0.577214	0.511321	2.61379	4.28806	360	380	4.96666	5.21726
		II13,2,1	45.49	0.02	37.75	0.65		0.04	0.02	0.32	11.1	95.55	3.01882	2.95235	0.981183	1.97117	0.0360693	0	0.0360693	0.00395638	0.000998008	0	0.00142191	0.0411698	0.939621	0.901154	0.0400257	2.98942	3.07671	360	380	-1.14698	-0.89638
		II13,2,2	47.1	0.31	30.89	3.48		1.22	0.18	11.13	0.08	94.41	3.13937	2.42644	0.860628	1.56581	0.193956	0	0.193956	0.121199	0.015537	0	0.0128533	1.43822	0.00680175	0.615431	0.315155	2.63594	3.64777	-	-	-	-
		II13,2,3	46.87	0.22	31.25	3.87	0.07	0.96	0.22	10.71	0.12	94.38	3.12973	2.45919	0.870272	1.58892	0.216086	0	0.216086	0.0955432	0.0110463	0.00395866	0.0157382	1.38647	0.0102212	0.693407	0.315587	2.68632	3.59626	-	-	-	-
		II13,2,4	45.71	0.57	28.16	5.6	0.11	1.86	0.24	10.74	0.15	93.27	3.13534	2.27633	0.864663	1.41167	0.321192	0	0.321192	0.190153	0.0293989	0.00639005	0.0176362	1.42819	0.0131242	0.628131	0.517735	2.62692	3.62608	-	-	-	-
		II13,3,4	47.65	0.29	31.49	4.13		1.1	0.05	11.31	0.01	96.1	3.1289	2.43687	0.871098	1.56577	0.226768	0	0.226768	0.107656	0.0143189	0	0.00351739	1.43979	0.000837603	0.678085	0.334424	2.67795	3.59191	-	-	-	-
		II13,3,5	44.84	0.33	31.08	3.45	0.15	1.11	0.12	10.33		91.41	3.08417	2.51933	0.915827	1.6035	0.198425	0	0.198425	0.113792	0.0170675	0.00873782	0.00884252	1.37747	0	0.635534	0.320955	2.73482	3.36764	-	-	-	-
		II13,3,6	44.1	0.53	28.02	5.92		1.78	0.14	10.63	0.32	91.8	3.09393	2.3167	0.906071	1.41063	0.347294	0	0.347294	0.186127	0.0279596	0	0.0105226	1.44582	0.0286372	0.651069	0.53342	2.69195	3.41467	-	-	-	-
		II13,2,5	45.26	0.27	30.45	3.96	0.03	1.03	0.05	10.77		92.02	3.10931	2.46528	0.890695	1.57458	0.227482	0	0.227482	0.105464	0.0139475	0.00174546	0.00367994	1.43441	0	0.683241	0.334691	2.70671	3.49088	-	-	-	-
		II14,5,2	46.04	0.58	29.14	5.57	0.06	1.74		0.2	11.26	94.71	3.18232	2.37371	0.817679	1.55603	0.321934	0	0.321934	0.179257	0.0301453	0.00351236	0	0.0268008	0.992787	0.642339	0.504703	2.72579	3.8919	360	380	3.32724	3.57784
		II14,5,3	46.24	0.62	29.02	5.76	0.06	1.75	0	0.19	10.89	94.82	3.19261	2.36133	0.807388	1.55394	0.332548	0	0.332548	0.180087	0.0321887	0.00350847	0	0.0254326	0.959103	0.648702	0.516144	2.72606	3.95425	360	380	3.60405	3.85465
		II14,5,4	46	0.43	29.87	5.06	0.05	1.53		0.25	11.23	94.46	3.17424	2.42911	0.825755	1.60336	0.291969	0	0.291969	0.157359	0.0223118	0.00292207	0	0.033445	0.988488	0.64979	0.45225	2.74339	3.84405	360	380	3.1096	3.3602
		II14,5,5	46.66	0.15	33.14	2.82	0	0.84		0.14	11.18	94.97	3.14874	2.63557	0.851265	1.7843	0.159127	0	0.159127	0.0844866	0.00761142	0	0	0.0183159	0.96237	0.653194	0.243614	2.80231	3.69889	360	380	2.41986	2.67046
		II14,5,6	51.23	0.14	29.16	3.27	0.02	0.87		0.1	10.22	95.11	3.41779	2.29266	0.582208	1.71045	0.18242	0	0.18242	0.0865083	0.00702316	0.00113003	0	0.0129339	0.869723	0.678322	0.270058	2.4821	5.87039	360	380	9.51916	9.76976
		II14,5,7	47.33	0.42	30.33	4.5	0.06	1.19		0.11	11.26	95.46	3.21808	2.43031	0.781924	1.64839	0.255844	0	0.255844	0.120593	0.021473	0.00345501	0	0.0144998	0.976579	0.679645	0.379893	2.70763	4.11559	360	380	4.28658	4.53718
		II14,5,8	47.91	0.39	30.43	4.34	0.04	1.42		0.2	10.7	95.52	3.23325	2.42017	0.766747	1.65342	0.24491	0	0.24491	0.14283	0.0197907	0.00228619	0	0.0261669	0.921099	0.631635	0.390026	2.68487	4.21685	360	380	4.69173	4.94233
		II14,5,9	46.87	0.34	30.34	5.32	0.18	1.32		0.12	10.66	95.27	3.19499	2.43736	0.805014	1.63235	0.303242	0	0.303242	0.134111	0.0174275	0.0103917	0	0.0158586	0.926916	0.693357	0.447745	2.75803	3.96886	360	380	3.66784	3.91844
		II4,5,11	45.55	0.18	30.38	5.78	0.4	1.47		0.13	10.32	94.21	3.14837	2.47466	0.851631	1.62303	0.334063	0	0.334063	0.151437	0.00935519	0.0234151	0	0.01742	0.909884	0.68808	0.508915	2.81808	3.69687	360	380	2.40992	2.66052
		II4,5,12	46.48	0.2	29.94	5.03	0.1	1.34		0.18	10.83	94.59	3.20437	2.43253	0.795627	1.63691	0.289967	0	0.289967	0.137689	0.0103679	0.00583869	0	0.0240579	0.952389	0.678038	0.433494	2.73287	4.02748	360	380	3.91972	4.17032
		II14,6,1	46.78	0.08	30.46	4.58		1.42	0.04	0.16	11.03	94.56	3.20202	2.4571	0.797984	1.65912	0.262139	0	0.262139	0.144867	0.00411753	0	0.00293322	0.021232	0.963048	0.644067	0.407006	2.72336	4.01263	360	380	3.85652	4.10712
		II14,6,2	43.8	0.48	29.3	10.53	1.06	2.01	0.02	0.12	8.18	96.2	3.04608	2.4014	0.953919	1.44748	0.612349	0	0.612349	0.208344	0.025101	0.0624327	0.00149011	0.0161792	0.725654	0.746137	0.883125	3.03885	3.19323	360	380	-0.39098	-0.14038
		II14,6,3	46.34	0.04	31.02	4.45	0.09	1.45		0.17	11.08	94.91	3.1707	2.50133	0.8293	1.67203	0.254602	0	0.254602	0.147871	0.00205799	0.00521531	0	0.0225505	0.967048	0.632594	0.407689	2.75799	3.82335	360	380	3.01397	3.26457
		II14,6,4	46.44	0.16	29.99	4.54	0.1	1.43	0.01	0.1	11.1	93.92	3.20608	2.43999	0.793924	1.64607	0.262084	0	0.262084	0.147141	0.00830586	0.00584683	0.000739611	0.0133841	0.977493	0.640439	0.415072	2.71038	4.03827	360	380	3.96537	4.21597
		II14,6,5	46.28	0.4	30.12	4.94	0.09	1.48		0.15	11.04	94.76	3.18164	2.44029	0.818364	1.62193	0.28398	0	0.28398	0.151648	0.0206776	0.00524009	0	0.019992	0.968134	0.651887	0.440868	2.74495	3.8878	360	380	3.3088	3.5594
		II14,6,6	46.39	0.07	31.4	3.96	0.05	1.2	0.02	0.23	10.8	94.21	3.17606	2.53352	0.823936	1.70959	0.226706	0	0.226706	0.122451	0.00360368	0.00289917	0.00146696	0.0305282	0.943187	0.649295	0.352057	2.76383	3.85475	360	380	3.15866	3.40926
		II14,6,7	46.09	0.07	31.82	3.88	0.06	1.26		0.15	11	94.54	3.15156	2.56419	0.848438	1.71575	0.221847	0	0.221847	0.128412	0.00359915	0.00347463	0	0.0198847	0.959447	0.633379	0.353734	2.78963	3.71455	360	380	2.49646	2.74706
		II14,6,8	46.22	0.35	30.9	4.33	0.08	1.14		0.12	10.95	94.27	3.17608	2.50237	0.823915	1.67845	0.248802	0	0.248802	0.116757	0.0180848	0.00465576	0	0.0159864	0.95981	0.680606	0.370215	2.76925	3.85487	360	380	3.15921	3.40981
		II14,6,9	45.87	0.11	29.31	5.55	0.12	2.08	0.01	0.12	11.14	94.39	3.17754	2.39281	0.822464	1.57034	0.321483	0	0.321483	0.214754	0.00572977	0.00704015	0.000742136	0.0161158	0.984364	0.599516	0.543277	2.72002	3.86343	360	380	3.19832	3.44892
		II14,6,10	46.42	0.13	33.24	3.13	0.06	0.81		0.27	11.01	95.1	3.13351	2.64434	0.866492	1.77785	0.176674	0	0.176674	0.0814944	0.00659861	0.00343017	0	0.0353344	0.94803	0.684337	0.261599	2.82761	3.61632	360	380	2.00649	2.25709
		II14,6,11	47.62	0.34	30.74	4.24	0.08	1.13	0	0.1	11.21	95.46	3.22081	2.45025	0.779188	1.67106	0.239798	0	0.239798	0.113913	0.0172917	0.00458252	0	0.0131125	0.967143	0.67795	0.358293	2.70734	4.13355	360	380	4.35971	4.61031
		II14,6,12	46.64	0.4	29.66	4.63	0.07	1.22	0	0.09	11.23	94.11	3.22035	2.41349	0.77965	1.63384	0.267318	0	0.267318	0.125551	0.0207677	0.00409337	0	0.0120475	0.989084	0.680425	0.396963	2.70158	4.1305	360	380	4.34734	4.59795
		II14,4,1	46.8	0.06	30.1	4.88	0.2	1.08		0.11	11.37	95.04	3.21514	2.43697	0.784862	1.65211	0.280335	0	0.280335	0.110585	0.00309948	0.0116365	0	0.0146506	0.996376	0.717116	0.402556	2.7204	4.09644	360	380	4.208	4.4586
		II14,4,2	46.28	0.07	29.5	6.05	0.2	0.94		0.07	11.13	94.81	3.20964	2.4111	0.790362	1.62074	0.35085	0	0.35085	0.0971645	0.00365043	0.0117471	0	0.00941172	0.984616	0.783122	0.459761	2.7656	4.06097	360	380	4.0608	4.3114
		II14,4,3	46.76	0.12	29.77	5.25	0.15	1.04	0	0.07	11.36	95.32	3.22065	2.41645	0.779346	1.63711	0.302365	0	0.302365	0.106763	0.0062149	0.00874983	0	0.00934708	0.998061	0.739048	0.417878	2.72503	4.13251	360	380	4.35548	4.60608
		II14,4,4	45.4	0.1	28.86	5.8	0.16	0.81	0.02	0.1	10.76	92.49	3.219	2.41152	0.781	1.63052	0.343872	0	0.343872	0.0855987	0.00533149	0.0096078	0.00151921	0.0137459	0.973165	0.800688	0.439078	2.76073	4.12164	360	380	4.31127	4.56187
		II4AB,3,5	44.7	0.5	30.05	3.73		1.43	0.06	0.13	10.83	91.52	3.1596	2.50322	0.840396	1.66283	0.220464	0	0.220464	0.150653	0.0265753	0	0.00454358	0.0178146	0.976478	0.594055	0.371117	2.75026	3.75966	213	356	0.882962	2.67475
		II4AB,2,7	46.4	0.63	30.44	4.23	0.02	1.63	0.01	0.14	10.77	94.46	3.17894	2.45776	0.821061	1.6367	0.24233	0	0.24233	0.166444	0.0324555	0.00116047	0.000733983	0.0185952	0.941215	0.592821	0.409935	2.73254	3.87175	213	356	1.42281	3.21461
		II4AB,4,3	44.85	0.51	29.47	5.3		2.24		0.2	11.08	93.78	3.13052	2.42418	0.86948	1.5547	0.309338	0	0.309338	0.233034	0.0267675	0	0	0.027064	0.986513	0.570343	0.542372	2.76028	3.60045	213	356	0.069164	1.86095
		II4AB,4,4	46.61	0.52	31.1	4.27	0.04	1.37	0.07	0.11	11.11	95.31	3.16697	2.49032	0.83303	1.65729	0.242603	0	0.242603	0.13874	0.0265675	0.00230178	0.00509548	0.0144899	0.962915	0.63618	0.383645	2.75949	3.80175	213	356	1.15316	2.94495
		II4AB,4,5	46.76	0.4	30.22	4.58	0.02	1.58	0.01	0.13	10.54	94.44	3.20267	2.43928	0.797333	1.64195	0.262305	0	0.262305	0.161291	0.0206006	0.00116013	0.000733769	0.0172619	0.920846	0.619233	0.424756	2.72219	4.01672	213	356	1.96053	3.75232
		II4AB,4,6	46.02	0.6	29.5	4.77		2.2		0.11	10.59	93.96	3.17939	2.40187	0.820615	1.58125	0.275561	0	0.275561	0.226536	0.0311696	0	0	0.0147332	0.933258	0.548821	0.502097	2.7086	3.87439	213	356	1.42281	3.21461
		1I4AB,2,4	48.27	0.25	32.15	2.7	0.02	1.44		0.11	10.85	95.81	3.21417	2.52291	0.785833	1.73708	0.150334	0	0.150334	0.142913	0.0125174	0.00112787	0	0.0142001	0.921573	0.512654	0.294375	2.68576	4.09014	213	356	2.22858	4.02037
		II4AB,2,5	47.14	0.14	33.59	2.29		1.14		0.12	9.79	94.21	3.16485	2.65768	0.835153	1.82253	0.128559	0	0.128559	0.114074	0.00706764	0	0	0.015619	0.838407	0.52985	0.242632	2.79331	3.78954	213	356	0.882962	2.67475
		II4АВ,2, 6	46.21	0.02	31.79	4.33		1.58	0.02	0.23	11.08	95.28	3.139	2.54493	0.860998	1.68393	0.24595	0	0.24595	0.159967	0.00102157	0	0.00145548	0.0302895	0.960073	0.605912	0.405917	2.7919	3.64577	213	356	0.340965	2.13275
		II4АВ,2, 7	46.32	0.49	32.35	3.42		1.29		0.12	11.3	95.49	3.13224	2.57805	0.867759	1.71029	0.193382	0	0.193382	0.130015	0.0249153	0	0	0.0157317	0.974707	0.597971	0.323397	2.79634	3.60957	213	356	0.069164	1.86095
		II44D,2,1	47.71	0.15	29.68	3.25	0.04	2.21	0.04	0.09	11.1	94.3	3.25227	2.38435	0.747733	1.63662	0.185252	0	0.185252	0.224536	0.00768867	0.00230927	0.00292118	0.011894	0.965181	0.452068	0.412098	2.5773	4.34951	213	356	3.29543	5.08722
		II44P,2,2	48.51	0.15	29.96	2.7		2.3	0	0.08	11.07	94.88	3.27306	2.38229	0.726943	1.65534	0.152331	0	0.152331	0.231296	0.00761021	0	0	0.0104646	0.95275	0.397082	0.383627	2.54223	4.50249	192	356	3.56251	5.61743
		II44D,2,3	49.92	0.08	28.52	3.04	0.02	2.63	0.08	0.11	10.38	94.82	3.35508	2.25896	0.644916	1.61404	0.170846	0	0.170846	0.263452	0.00404298	0.00113841	0.00576024	0.0143328	0.889888	0.393385	0.435437	2.43385	5.20236	213	356	6.18507	7.97686
		II44P,2,4	48.71	0.17	29.08	2.64	0.01	2.34	0	0.07	11.04	94.16	3.30962	2.32855	0.690378	1.63817	0.149992	0	0.149992	0.23697	0.00868545	0.000575439	0	0.00922076	0.956838	0.387614	0.387537	2.48722	4.79393	192	356	4.6165	6.67142
		II44D,2,6	47.86	0.15	29.7	3.54	0.1	2.17	0.04	0.11	11.17	94.88	3.24974	2.37664	0.750257	1.62638	0.200994	0	0.200994	0.219611	0.00765862	0.00575063	0.00290977	0.0144803	0.967472	0.477869	0.426355	2.58529	4.33151	213	356	3.29543	5.08722
		II44D,2,7	48.4	0.15	27.87	3.92	0.07	2.65	0	0.09	11.09	94.44	3.31218	2.24769	0.687819	1.55987	0.224315	0	0.224315	0.270291	0.00771868	0.004057	0	0.0119404	0.968076	0.453522	0.498663	2.47972	4.81548	213	356	4.87963	6.67142
		II44P,2,8	48.72	0.12	29.17	3.56	0.06	2.42	0.03	0.03	11.17	95.39	3.28774	2.31983	0.712262	1.60757	0.200883	0	0.200883	0.243401	0.00608912	0.0034291	0.00216887	0.00392482	0.961506	0.45215	0.447713	2.5268	4.61591	192	356	4.09058	6.1455
		II44D,3,1	47.63	0.34	30.2	3.07		1.65	0.04	0.14	11.13	94.44	3.24493	2.42472	0.755067	1.66966	0.174891	0	0.174891	0.167543	0.0174176	0	0.00291949	0.018491	0.967229	0.510729	0.342434	2.61703	4.29754	213	356	3.02952	4.82131
		II44D,3,2	46.96	0.16	32.76	2.6	0.04	0.95		0.18	11.31	94.96	3.16745	2.60409	0.832552	1.77153	0.146642	0	0.146642	0.0955041	0.00811493	0.00228497	0	0.0235376	0.97309	0.605593	0.244431	2.75884	3.8045	213	356	1.15316	2.94495
		II44D,3,3	48.15	0.37	30.26	2.87		1.74	0.01	0.12	11.12	94.83	3.25816	2.4131	0.741841	1.67126	0.162391	0	0.162391	0.175486	0.0188261	0	0.000724933	0.0157422	0.95982	0.480621	0.337877	2.59431	4.39199	213	356	3.5608	5.35259
		II44D,3,4	47.49	0.07	33.01	1.98		0.96	0	0.16	11.16	94.96	3.18923	2.61252	0.810769	1.80175	0.111187	0	0.111187	0.0960887	0.0035348	0	0	0.0208311	0.955998	0.53642	0.207275	2.72724	3.93359	213	356	1.69194	3.48373
		II44A,1,1	47.15	0.3	28.5	3.48	0.04	2.22	0.01	0.12	11.24	93.23	3.26852	2.32833	0.731483	1.59684	0.201721	0	0.201721	0.229371	0.0156377	0.00234838	0.000742662	0.0161272	0.993904	0.46793	0.433441	2.54569	4.46834	192	356	3.56251	5.61743
		II44A,1,2	47.9	0.29	27.86	3.86	0.14	2.47		0.14	11.25	94.07	3.29675	2.25975	0.703253	1.5565	0.222147	0	0.222147	0.253375	0.0150083	0.0081605	0	0.0186804	0.987669	0.467164	0.483683	2.49691	4.68785	192	356	4.35381	6.40873
		II44A,1,3	45.56	0.36	26.11	7.02	0.28	3.1	0.12	0.09	9.58	92.32	3.23599	2.18555	0.764012	1.42153	0.41693	0	0.41693	0.328172	0.0192269	0.016843	0.00913117	0.0123929	0.867956	0.559561	0.761946	2.6217	4.23552	192	356	2.76639	4.82131
		II44A,1,3	45.56	0.36	26.11	7.02	0.28	3.1	0.12	0.09	9.58	92.32	3.23599	2.18555	0.764012	1.42153	0.41693	0	0.41693	0.328172	0.0192269	0.016843	0.00913117	0.0123929	0.867956	0.559561	0.761946	2.6217	4.23552	192	356	2.76639	4.82131
		II44A,1,6	46.85	0.23	30.32	3.87		1.54	0.01	0.18	11.08	94.19	3.21236	2.45004	0.787643	1.6624	0.221885	0	0.221885	0.157381	0.0118584	0	0.000734575	0.0239274	0.969087	0.585038	0.379266	2.68379	4.07844	192	356	1.96545	4.02037
		II44A,1,8	44.1	0.18	28.84	7.02	0.08	1.51		0.13	10.93	92.89	3.13497	2.41613	0.865026	1.55111	0.417288	0	0.417288	0.159989	0.00962168	0.00481642	0	0.0179162	0.991116	0.722856	0.582093	2.84304	3.62414	192	356	-0.19397	1.86095
		II44A,3,2	46.33	0.14	31.48	2.83	0.03	1.47		0.18	11.35	93.87	3.17496	2.54238	0.825043	1.71734	0.162168	0	0.162168	0.150145	0.00721418	0.00174115	0	0.0239142	0.992157	0.519249	0.314054	2.71176	3.84823	192	356	0.890026	2.94495
		1I44A,3,5	45.77	0.43	29.5	4.87	0.05	2.25		0.17	11.08	94.21	3.16578	2.40465	0.834218	1.57043	0.281665	0	0.281665	0.231953	0.0223641	0.00292893	0	0.0227959	0.977572	0.548394	0.516546	2.70868	3.79491	192	356	0.890026	2.94495
		II44A,3,6	47.42	0.45	29.35	3.68	0.03	2.13		0.16	10.94	94.42	3.2437	2.36602	0.756297	1.60972	0.21049	0	0.21049	0.217158	0.023146	0.00173796	0	0.0212182	0.954566	0.492203	0.429386	2.59965	4.28893	192	356	2.76639	4.82131
		I434,5,5	47.06	0.21	31.2	3.27	0.04	1.6	0.02	0.15	10.78	94.52	3.19968	2.5	0.800318	1.69968	0.185911	0	0.185911	0.162141	0.0107364	0.00230332	0.00145682	0.0197722	0.934938	0.534148	0.350355	2.69665	3.99801	192	356	1.6974	3.75232
		I434,5,6	47.14	0.25	31.56	2.27	0.02	1.76	0.02	0.18	11.3	94.64	3.19323	2.51946	0.806773	1.71269	0.128579	0	0.128579	0.177693	0.012734	0.00114738	0.00145142	0.0236386	0.9764	0.419819	0.307419	2.66077	3.95802	192	356	1.42881	3.48373
		I434,5,9	47.93	0.45	30.52	2.73	0.01	2.28	0.02	0.15	11.39	95.5	3.22249	2.41824	0.777506	1.64073	0.15348	0	0.15348	0.228474	0.0227499	0.000569408	0.00144058	0.0195517	0.976827	0.401828	0.382523	2.59447	4.14466	192	356	2.23296	4.28788
		I434,5,11	47.95	0.29	30.82	2.44	0.01	2.11		0.15	11.31	95.29	3.22855	2.44558	0.771453	1.67412	0.137376	0	0.137376	0.211747	0.0146825	0.00057024	0	0.0195802	0.971382	0.393489	0.349694	2.59764	4.18502	192	356	2.49994	4.55486
		I434,2,2	47.14	0.23	31.65	2.12	0.03	1.69	0.01	0.19	11.31	94.44	3.19494	2.528	0.805063	1.72293	0.120147	0	0.120147	0.170717	0.0117215	0.001722	0.000726097	0.0249652	0.977787	0.413069	0.292586	2.65986	3.96855	192	356	1.42881	3.48373
		I434,2,3	45.1	0.27	30.75	3.64	0.07	2.02	0	0.16	10.55	92.69	3.14063	2.52357	0.85937	1.6642	0.211956	0	0.211956	0.209657	0.014138	0.00412835	0	0.0216007	0.937134	0.502726	0.425741	2.74966	3.65457	192	356	0.077835	2.13275
		I431,4,5	46.09	0.5	30.13	3.63	0.11	2.16		0.14	11.28	94.11	3.17122	2.44314	0.828779	1.61436	0.208848	0	0.208848	0.221509	0.0258686	0.0064099	0	0.0186748	0.990006	0.48529	0.436766	2.67786	3.82637	192	356	0.890026	2.94495
		I431,4,6	46.5	0.36	29.48	3.12	0.04	2.24	0.01	0.14	11.14	93.19	3.21926	2.40525	0.780742	1.62451	0.180618	0	0.180618	0.231136	0.0187408	0.00234532	0.000741694	0.0187905	0.983778	0.438655	0.414099	2.60461	4.12333	192	356	2.23296	4.28788
		I431,4,7	47.78	0.34	30.36	2.2		2.37	0.02	0.16	11.08	94.57	3.23722	2.42414	0.762783	1.66136	0.124638	0	0.124638	0.239327	0.0173216	0	0.0014517	0.0210162	0.957579	0.342446	0.363965	2.5661	4.24396	192	356	2.76639	4.82131
		I431,4,8	48.13	0.45	30.97	2.39	0.08	2.21		0.15	11.45	95.83	3.21857	2.44072	0.781429	1.65929	0.133644	0	0.133644	0.220271	0.0226278	0.00453081	0	0.0194467	0.976701	0.377616	0.358445	2.59699	4.11882	192	356	2.23296	4.28788
		I431,4,9	46.65	0.45	29.06	3.54	0.09	2.48		0.14	11.19	93.85	3.22021	2.36406	0.779788	1.58427	0.204333	0	0.204333	0.255154	0.0233576	0.00526155	0	0.0187357	0.985308	0.444699	0.464748	2.59175	4.1296	192	356	2.23296	4.28788
		I431,5,1	46.76	0.5	29.48	2.8	0.01	2.54	0.02	0.11	11.44	93.89	3.21585	2.38935	0.784149	1.6052	0.161021	0	0.161021	0.260359	0.0258568	0.000582452	0.00147358	0.0146664	1.00359	0.382128	0.421962	2.57622	4.10107	192	356	2.23296	4.28788
		1431,5,2	47.42	0.45	29.69	3.6	0.05	2.24		0.18	11.02	94.75	3.22794	2.38179	0.772063	1.60973	0.204913	0	0.204913	0.227263	0.0230335	0.00288252	0	0.0237544	0.956873	0.474142	0.435058	2.60974	4.18092	192	356	2.49994	4.55486
		I3,1,5	47.55	0.39	30.27	3.01	0.09	2.33		0.12	11.48	95.34	3.2148	2.41183	0.785196	1.62663	0.170166	0	0.170166	0.234789	0.0198268	0.0051533	0	0.0157287	0.990045	0.420211	0.410108	2.60182	4.09427	213	356	2.22858	4.02037
		I3,1,6	47.77	0.42	30.74	3.02		2.08		0.1	11.2	95.44	3.21628	2.43912	0.783715	1.6554	0.170024	0	0.170024	0.208728	0.0212633	0	0	0.0130529	0.961892	0.448906	0.378751	2.63041	4.10389	213	356	2.49609	4.28788
		I3,3,2	46.53	0.29	30.84	2.88	0.03	2.03	0.01	0.08	11.4	94.17	3.18239	2.48579	0.817609	1.66818	0.164709	0	0.164709	0.206935	0.0149143	0.00173772	0.000732727	0.0106076	0.994568	0.44319	0.373381	2.66542	3.89231	213	356	1.42281	3.21461
		I3,3,4	47.81	0.42	29.67	3.29	0.05	1.97	0	0.12	11.07	94.56	3.25425	2.38002	0.745749	1.63427	0.187254	0	0.187254	0.199855	0.0214963	0.00288231	0	0.0158351	0.961145	0.483724	0.389992	2.58877	4.36373	213	356	3.29543	5.08722
		I3,2,4	45.8	0.53	29.81	4.08	0.03	2.07		0.12	11.32	93.82	3.16951	2.43119	0.830493	1.60069	0.236097	0	0.236097	0.213508	0.0275794	0.00175827	0	0.0160996	0.999267	0.525121	0.451363	2.69486	3.81642	213	356	1.15316	2.94495
		I3,2,5	47.25	0.58	29.64	3.87	0.04	2.53	0.01	0.14	11.25	95.53	3.20575	2.36993	0.794254	1.57568	0.219554	0	0.219554	0.255838	0.0295896	0.0022984	0.000726857	0.0184147	0.973618	0.461838	0.47769	2.61907	4.03617	213	356	2.22858	4.02037
		II4,3,7	47.88	0.34	31.17	2.64		1.75	0.03	0.17	11.27	95.44	3.21985	2.47029	0.78015	1.69014	0.148453	0	0.148453	0.175403	0.0171927	0	0.00216135	0.0221635	0.966751	0.458392	0.323856	2.63594	4.12722	192	356	2.23296	4.28788
		II4,3,8	48.38	0.46	30.95	2.45		1.92	0.01	0.14	11.24	95.79	3.23732	2.44068	0.762683	1.67799	0.137085	0	0.137085	0.191486	0.0231452	0	0.000716871	0.0181617	0.959389	0.417215	0.328571	2.60091	4.24464	192	356	2.76639	4.82131
		II4,3,10	47.9	0.24	30.39	2.77	0.03	2.25		0.17	11.21	95.16	3.23465	2.41853	0.765352	1.65318	0.156414	0	0.156414	0.22646	0.0121867	0.00171574	0	0.0222561	0.96562	0.408526	0.384589	2.58714	4.22636	192	356	2.49994	4.55486
		II4,3,11	46.52	0.21	31.91	2.88		1.34		0.17	11.19	94.24	3.1691	2.56184	0.830903	1.73094	0.164056	0	0.164056	0.136056	0.0107572	0	0	0.0224519	0.972377	0.546649	0.300112	2.73666	3.81404	192	356	0.890026	2.94495
		II4,1,1	47.36	0.29	29.78	3.26		2.24	0.02	0.1	11.17	94.31	3.23363	2.39626	0.76637	1.62989	0.186123	0	0.186123	0.227952	0.0148888	0	0.00146295	0.0132369	0.972839	0.44949	0.414075	2.59727	4.21941	192	356	2.49994	4.55486
		II4,1,2	48.4	0.23	30.94	2.41	0.04	1.88	0.02	0.17	11.21	95.42	3.2458	2.44527	0.754196	1.69108	0.135144	0	0.135144	0.187911	0.0115981	0.00227183	0.00143691	0.0221021	0.95894	0.418332	0.325327	2.59202	4.30366	192	356	3.0323	5.08722
		II4,1,3	47.22	0.22	30.71	2.3		1.4		0.2	11.45	93.84	3.23495	2.47943	0.765048	1.71438	0.131757	0	0.131757	0.142951	0.0113331	0	0	0.0265632	1.00059	0.479625	0.274708	2.62252	4.22843	192	356	2.49994	4.55486
		II4,2,l	47.14	0.29	31.71	2.18	0.01	1.77	0	0.17	11.25	94.74	3.18943	2.52842	0.810573	1.71785	0.123334	0	0.123334	0.17849	0.0147538	0.000573009	0	0.0222987	0.970923	0.408629	0.302397	2.66651	3.93478	192	356	1.42881	3.48373
		II4,2,2	47.66	0.4	30.96	2.6	0.02	1.97		0.18	11.09	95.15	3.21581	2.46188	0.784193	1.67769	0.146694	0	0.146694	0.198116	0.0202945	0.00114289	0	0.023546	0.954501	0.425434	0.345953	2.62887	4.10078	192	356	2.23296	4.28788
		II4,2,5	46.74	0.24	31.59	2.15	0.05	1.71		0.23	11.34	94.25	3.18297	2.53526	0.817033	1.71823	0.122429	0	0.122429	0.173563	0.0122896	0.00288371	0	0.0303654	0.985066	0.413623	0.298876	2.66998	3.89576	192	356	1.15969	3.21461
		II4,2,6	46.68	0.03	30.57	3.36	0.09	2.08		0.14	11.37	94.42	3.19291	2.46423	0.807087	1.65715	0.192176	0	0.192176	0.212049	0.00154298	0.0052136	0	0.0185649	0.992032	0.475418	0.409439	2.65795	3.9561	192	356	1.42881	3.48373
		II4,2,7	46.56	0.23	30.53	3.22	0.04	1.49		0.16	11.4	93.66	3.20484	2.47657	0.795163	1.6814	0.185333	0	0.185333	0.152861	0.0119043	0.0023318	0	0.0213511	1.00094	0.548008	0.340525	2.6738	4.03041	192	356	1.6974	3.75232
		I31,4,11	46.96	0.35	28.61	4.73	0.03	2.31		0.14	10.96	94.16	3.23718	2.32427	0.762824	1.56144	0.272648	0	0.272648	0.237338	0.0181422	0.00175145	0	0.01871	0.963735	0.534619	0.511738	2.61506	4.24368	213	356	3.02952	4.82131
		I31,4,14	46.17	0.08	35.19	1.34	0.03	0.62	0.01	0.19	10.66	94.6	3.10185	2.78619	0.898148	1.88804	0.0752782	0	0.0752782	0.0620826	0.00404142	0.00170695	0.000719752	0.024747	0.91354	0.548033	0.139068	2.86551	3.45361	-	-	-	-
		I31,4,15	46.21	0.05	36.28	1.09		0.45		0.22	10.77	95.24	3.07519	2.84534	0.924806	1.92053	0.0606549	0	0.0606549	0.044634	0.00250201	0	0	0.0283836	0.914242	0.576081	0.105289	2.90849	3.32523	-	-	-	-
		I31,4,16	46.24	0.02	34.08	2.12	0.06	0.96	0.01	0.19	10.98	94.8	3.11653	2.70697	0.883472	1.82349	0.119479	0	0.119479	0.0964365	0.0010136	0.00342486	0.000722063	0.0248265	0.943984	0.55336	0.219341	2.82746	3.52759	-	-	-	-
		I31,4,17	46.53		35.56	1.52	0.04	0.7	0	0.23	11	95.59	3.09248	2.78526	0.907523	1.87773	0.0844734	0	0.0844734	0.0693408	0	0.0022515	0	0.0296353	0.932556	0.549191	0.156066	2.86973	3.4076	-	-	-	-
		I31,3,9	47.16	0.11	28.93	4.81	0.05	2.84		0.11	10.88	95.15	3.22272	2.32985	0.777279	1.55257	0.274851	0	0.274851	0.289257	0.00565229	0.00289373	0	0.014573	0.94839	0.487231	0.567002	2.61035	4.14616	213	356	2.49609	4.28788
		I31,1,13	48.09	0.03	33.09	1.13	0.05	1.6		0.15	10.87	95.17	3.2027	2.5971	0.797303	1.79979	0.0629278	0	0.0629278	0.158817	0.00150233	0.00282013	0	0.0193669	0.923421	0.283784	0.224565	2.66153	4.01691	213	356	1.96053	3.75232
		I31,4,2	47.54	0.07	29.92	4.76	0.07	2.74		0.12	10.36	95.71	3.20972	2.38068	0.790275	1.5904	0.268732	0	0.268732	0.275725	0.00355377	0.00400263	0	0.0157072	0.892231	0.493578	0.548459	2.65296	4.06153	213	356	2.22858	4.02037
Type-3 Epithermal deposits	Luiz Bastos	2l	47.38	0.24	30.05	3.39	0.04	2.12	0	0.08	11.09	94.64	3.2287	2.41328	0.771297	1.64198	0.193168	0	0.193168	0.215321	0.0122978	0.00230851	0	0.0105689	0.963992	0.472885	0.410798	2.61875	4.18607	123	171	1.60078	2.20222	new data
		3l	44.69	0.11	31.62	4.77	0.09	2.31	0	0.17	10.13	93.92	3.08062	2.56874	0.919382	1.64935	0.274947	0	0.274947	0.237332	0.00570169	0.00525423	0	0.0227188	0.89073	0.536713	0.517533	2.84938	3.35075	-	-	-	-
		5l	45.12	1.14	33.64	1.71	0.01	0.96	0	0.3	10.23	93.27	3.0807	2.70686	0.919299	1.78757	0.0976292	0	0.0976292	0.0976942	0.0585286	0.000578255	0	0.0397109	0.890974	0.499834	0.195902	2.86302	3.35114	-	-	-	-
		5n	46.61	0.07	32.97	1.81	0	1.15	0	0.25	10.54	93.54	3.16878	2.64157	0.831216	1.81036	0.102895	0	0.102895	0.116528	0.00357845	0	0	0.0329505	0.914036	0.468936	0.219423	2.74805	3.81223	-	-	-	-
		6d	46.98	0.66	31.39	3.2	0.03	1.65	0	0.28	10.27	94.7	3.18167	2.50532	0.818333	1.68699	0.181215	0	0.181215	0.166549	0.03361	0.00172069	0	0.0367628	0.887199	0.521086	0.349485	2.72014	3.88799	123	171	0.340019	0.941459
		1a	45.95	0.46	35.29	1.39	0	0.66	0	0.33	10.84	94.95	3.07535	2.7835	0.92465	1.85885	0.0777906	0	0.0777906	0.065837	0.0231499	0	0	0.0428185	0.925438	0.541613	0.143628	2.88444	3.32596	-	-	-	-
		1b	44.88	0.5	35.66	2.03	0	0.68	0	0.23	10.9	94.98	3.02064	2.8285	0.979365	1.84914	0.114247	0	0.114247	0.0682137	0.0253045	0	0	0.0300111	0.935795	0.626146	0.182461	2.96806	3.08428	-	-	-	-
		2c	46.24	1.12	35.44	1.52	0.05	0.61	0	0.25	11.01	96.24	3.05856	2.76263	0.941439	1.82119	0.084071	0	0.084071	0.0601376	0.0557058	0.00280097	0	0.0320588	0.928957	0.582982	0.14701	2.90241	3.24881	-	-	-	-
		2d	45.85	0.76	34.64	2.09	0.01	0.85	0	0.16	11.09	95.46	3.06915	2.73266	0.930853	1.80181	0.116984	0	0.116984	0.0848036	0.0382538	0.000566914	0	0.0207638	0.946932	0.579739	0.202355	2.8879	3.29713	-	-	-	-
		3e	46.39	0.44	35.71	1.13	0.05	0.45	0	0.43	10.7	95.54	3.08393	2.7977	0.916067	1.88163	0.0628148	0	0.0628148	0.0445872	0.0219946	0.00281507	0	0.0554188	0.907347	0.584857	0.110217	2.88251	3.36649	-	-	-	-
		3f	44.85	0.56	33.7	2.39	0.05	1.03	0	0.18	10.9	93.76	3.06776	2.71655	0.932243	1.78431	0.136697	0	0.136697	0.105006	0.0288025	0.00289646	0	0.0238693	0.95103	0.565559	0.244599	2.88205	3.29073	-	-	-	-
		4f	45.95	0.38	36.18	1.29	0	0.56	0	0.37	10.86	95.74	3.05173	2.83178	0.948266	1.88352	0.0716397	0	0.0716397	0.0554327	0.018977	0	0	0.0476399	0.920026	0.563771	0.127072	2.9224	3.21823	-	-	-	-
		5e	45.97	2.37	31.33	2.54	0	1.24	0	0.13	11.02	94.82	3.12114	2.50686	0.878858	1.628	0.144204	0	0.144204	0.125481	0.120996	0	0	0.0171116	0.954398	0.534712	0.269684	2.77206	3.55136	-	-	-	-
		5l	45.75	0.77	35.87	1.4	0.02	0.62	0	0.19	10.97	95.82	3.04337	2.81206	0.956634	1.85543	0.0778743	0	0.0778743	0.0614712	0.0385156	0.00112676	0	0.0245033	0.930848	0.558858	0.140472	2.92845	3.18133	-	-	-	-
		6j	45.42	0.51	35.85	1.3	0.03	0.45	0	0.41	10.61	94.66	3.04779	2.83503	0.952207	1.88282	0.0729432	0	0.0729432	0.0450058	0.0257331	0.0017049	0	0.0533372	0.908161	0.61843	0.119654	2.93371	3.20077	-	-	-	-
	Trairão	MA10B,1,3	45.68	0.87	33.62	4.08	0.05	0.83	0	0.6	10.56	96.28	3.06189	2.65577	0.938113	1.71766	0.228679	0	0.228679	0.0829198	0.0438496	0.00283839	0	0.0779691	0.902892	0.733889	0.314437	2.9283	3.26388	-	-	-	-	Silva and Abram 2008
		MA10B,1,4	44.92	0.12	34.28	3.63	0.03	0.65	0.02	0.5	10.54	94.88	3.05244	2.74523	0.947559	1.79767	0.206261	0	0.206261	0.0658322	0.00613157	0.0017265	0.00145599	0.0658697	0.913602	0.758053	0.27382	2.95762	3.22137	-	-	-	-
		MA10B,1,5	46.67	0.02	34.32	2.03	0.09	0.41	0.01	0.23	9.81	93.84	3.15116	2.73093	0.848838	1.88209	0.114613	0	0.114613	0.0412604	0.00101542	0.00514653	0.000723361	0.0301071	0.844911	0.735294	0.16102	2.84656	3.71233	-	-	-	-
		MA10B,1,6	47.14	0.2	33.52	2.29	0.08	0.77	0.01	0.05	10.47	94.56	3.16757	2.65442	0.832433	1.82199	0.128669	0	0.128669	0.0771159	0.0101053	0.00455266	0.000719877	0.0065135	0.897412	0.62526	0.210338	2.7932	3.80519	-	-	-	-
		MA10B,3,1	45.15	0.97	32.71	4.32	0.04	0.73	0	0.43	10.69	95.06	3.07426	2.62478	0.925738	1.69905	0.245963	0	0.245963	0.0740838	0.0496636	0.00230665	0	0.0567623	0.928474	0.768522	0.322354	2.92041	3.32088	-	-	-	-
		MA10B,3,2	44.68	0.79	33.11	4.18	0.04	0.75	0.02	0.26	10.74	94.66	3.05554	2.66848	0.944457	1.72403	0.239031	0	0.239031	0.0764458	0.0406243	0.00231672	0.0014653	0.0344712	0.93689	0.757682	0.317794	2.94814	3.23524	-	-	-	-
		MA10B,3,3	47.68	0.18	33.7	3	0.03	0.77	0.03	0.1	10.43	96.17	3.16587	2.63704	0.834127	1.80292	0.166564	0	0.166564	0.0762018	0.00898696	0.00168701	0.00213403	0.0128726	0.883386	0.68611	0.244453	2.81259	3.79543	-	-	-	-
		MA10B,3,4	46.55	0	32.45	3.75	0.04	0.82	0	0.24	10.64	94.65	3.16326	2.59872	0.836738	1.76199	0.213084	0	0.213084	0.0830513	0	0.00230205	0	0.031618	0.922287	0.719549	0.298437	2.81181	3.78047	-	-	-	-
		MA10B,3,5	51.3	0.08	29.76	1.39	0.08	2.59	0	0.06	10.81	96.29	3.37154	2.30502	0.628461	1.67656	0.0763886	0	0.0763886	0.253704	0.00395352	0.00445287	0	0.00764488	0.906245	0.231416	0.334546	2.38536	5.36476	-	-	-	-
		MA10B,2,2	49.82	0.15	31.49	2.21	0.09	1.93	0	0.17	10.79	96.77	3.27412	2.4389	0.725882	1.71301	0.121447	0	0.121447	0.189045	0.00741251	0.00500924	0	0.0216595	0.904526	0.391143	0.315501	2.56776	4.51054	-	-	-	-
		MA10B,2,3	48.95	0.01	34.5	1.77	0.07	0.76	0	0.18	10.25	96.51	3.1996	2.65762	0.800395	1.85722	0.0967431	0	0.0967431	0.0740414	0.000491504	0.00387508	0	0.02281	0.854627	0.566463	0.17466	2.75485	3.99753	-	-	-	-
		MA10B_1_6	49.07	0.01	30.66	2.51	0.04	1.93	0	0.24	11.48	95.93	3.27296	2.41005	0.727042	1.68301	0.139991	0	0.139991	0.191866	0.000501542	0.00225956	0	0.0310344	0.976732	0.421842	0.334117	2.55055	4.50175	-	-	-	-
		MA10B_2_2	45.52	0.27	29.69	5.04	0.08	1.59	0.02	0.22	10.79	93.51	3.17516	2.44064	0.824837	1.6158	0.293966	0	0.293966	0.165302	0.0141615	0.00472599	0.00149457	0.0297505	0.960051	0.640075	0.463994	2.74877	3.84944	-	-	-	-
		MA10B_3_4	47.21	0.37	32.32	2.12	0.04	1.71	0	0.18	11.13	95.11	3.17158	2.55884	0.828419	1.73042	0.119091	0	0.119091	0.17122	0.0186907	0.00227583	0	0.0234435	0.953775	0.410219	0.292588	2.69662	3.82847	-	-	-	-
		MA10B_7_1	46.69	0.08	33.1	2.13	0.03	1.45	0	0.29	10.96	94.98	3.146	2.62841	0.854002	1.77441	0.12001	0	0.12001	0.14562	0.00405329	0.00171196	0	0.0378827	0.942007	0.451795	0.267341	2.75247	3.68383	-	-	-	-
		MA10A_1_4	44.71	0.38	33.74	3.66	0.05	0.62	0.06	0.45	10.48	94.18	3.05763	2.71929	0.942371	1.77692	0.209298	0	0.209298	0.0631959	0.019541	0.00289594	0.00439596	0.0596624	0.914219	0.768083	0.27539	2.94813	3.24461	-	-	-	-
		MA10A_3_1	46.9	0.35	32.3	2.34	0	1.5	0.05	0.21	10.86	94.93	3.16891	2.57199	0.831094	1.7409	0.132207	0	0.132207	0.151058	0.0177823	0	0.00361933	0.0275083	0.935999	0.466725	0.283266	2.72198	3.81294	-	-	-	-
		MA10A_5_1	45.69	0.97	32.61	4.3	0.09	0.74	0	0.39	10.81	95.6	3.09224	2.60096	0.907757	1.6932	0.243346	0	0.243346	0.0746451	0.0493637	0.00515862	0	0.0511712	0.933227	0.76526	0.32315	2.89367	3.40647	-	-	-	-
		MA10A_6_3	49.21	0.14	35.17	0.91	0.19	0.75	0.04	0.05	9.06	95.59	3.20849	2.7024	0.79151	1.91089	0.0496126	0	0.0496126	0.0728829	0.0068637	0.0104915	0.00279402	0.00632012	0.753502	0.405016	0.132987	2.75888	4.05363	-	-	-	-
A Fe# = FeTot/(FeTot + Mg)
B R2+= (Mg2+,Fe2+,Mn2+,Ni2+)
C R3+= (Al3+,Fe3+,Cr3+,Ti4+)
